# Supplementary material for: High concentrations of floating neustonic life in the plastic-rich North Pacific Garbage Patch
Source: PubMed Central journal article supplement (PMC10159152; doi:10.1371/journal.pbio.3001646), 2023-05-04
Supplement: pbio.3001646.s001.pdf [file pbio.3001646.s001.pdf]

1 Supporting information: high concentrations of floating neustonic  
2 life in the plastic-rich North Pacific Garbage Patch

3 Fiona Chong

4 Matthew Spencer

5 Nikolai Maximenko

6 Jan Hafner

7 Andrew C. McWhirter

8 Rebecca R. Helm

9 **A Motivation**

- 10 1. Observations are counts, not densities. Empirical estimates of density can be obtained by dividing  
11 the count by the area trawled. However, when the expected number of objects in a given category  
12 caught in a trawl is low, chance variation in the number actually caught can have a large effect on  
13 the estimated density, and it is inappropriate to treat densities as continuous.
- 14 2. Sites were selected on the basis of modelled tracer concentrations. Thus, tracer concentration is  
15 not a random variable. In addition, the data needed for this study were not available from every  
16 site because of operational constraints.
- 17 3. It is likely that the relationship between neuston and plastic densities differs among neuston taxa.
- 18 4. It is plausible that the relationship between neuston and plastic densities differs between areas with  
19 different oceanographic conditions, and these areas are also likely to differ in tracer concentrations.
- 20 5. All studies will be subject to study-specific sampling biases that lead to consistent over- or under-  
21 counting of particular components. For example, it is likely that visual counts will underestimate  
22 the number of plastic particles, while counts from frozen samples will underestimate the numbers  
23 of soft-bodied neuston taxa.

24 6. The measurement process in our data involved visual counts of objects on photographs by two  
 25 independent observers.

## 26 B Basic model

27 We will first consider the basic case with a single set of counts for each observation, and then refine the  
 28 model to account for the measurement process. Let  $\mathbf{y}_i = (y_{i1}, y_{i2}, \dots, y_{i,m-1}, y_{i,m})$  be the counts of  $m-1$   
 29 neuston taxa (the first  $m-1$  values) and plastic particles ( $y_{i,m}$ ) in the  $i$ th observation,  $i = 1, \dots, n$ . Let  
 30  $a_i$  be the area trawled in the  $i$  observation,  $x_i$  be the centered and scaled log of modelled concentration  
 31 of the tracer at the location of the  $i$ th observation, and  $p_i$  be an indicator variable taking the value 1  
 32 if the observation is inside the patch and 0 otherwise. We will model the relationship between  $\mathbf{y}$  and  $x$   
 33 using a multivariate Poisson-lognormal regression [1]:

$$\begin{aligned}
 y_{ij} &\sim \text{Poisson}(a_i \lambda_{ij}), \\
 \lambda_{ij} &= e^{\eta_{ij}}, \\
 \boldsymbol{\eta}_i &= \boldsymbol{\beta}_0 + \boldsymbol{\beta}_1 x_i + \boldsymbol{\beta}_2 p_i + \boldsymbol{\beta}_3 x_i p_i + \boldsymbol{\varepsilon}_i, \\
 \boldsymbol{\varepsilon}_i &\sim N(\mathbf{0}, \boldsymbol{\Sigma}).
 \end{aligned}
 \tag{A}$$

34 Here,  $\lambda_{ij}$  is the rate (numbers  $\text{L}^{-2}$ ) for the  $j$ th variable in the  $i$ th observation,  $\boldsymbol{\eta}_i$  is the  $(m+1)$ -dimensional  
 35 linear predictor for the  $i$ th observation,  $\boldsymbol{\beta}_0$  is the intercept vector,  $\boldsymbol{\beta}_1$  is the coefficient vector for the  
 36 effect of log tracer concentration,  $\boldsymbol{\beta}_2$  is the coefficient vector for the effect of patch membership,  $\boldsymbol{\beta}_3$  is  
 37 the coefficient vector for the interaction between tracer concentration and patch membership, and  $\boldsymbol{\varepsilon}_i$  is a  
 38 multivariate normal observation-level random effect, with mean vector  $\mathbf{0}$  and covariance matrix  $\boldsymbol{\Sigma}$ . This  
 39 random effect represents unpredictable effects such as small-scale spatial variability. We assume that  
 40 the  $\boldsymbol{\varepsilon}_i$  are identically distributed, independent of each other and of explanatory variables, and that the  
 41 counts  $y_{ij}$  are conditionally independent, given the trawled areas  $a_i$  and rates  $\lambda_{ij}$ .

42 The use of a Poisson observation model for the counts  $y_{ij}$  (with an offset  $a_i$  to account for variation  
 43 in trawled area among observations) addresses point 1. A linear predictor on the log scale is the natural  
 44 choice for count data, to ensure that expected values are positive. We use log tracer concentration rather  
 45 than tracer concentration as an explanatory variable, because we expect that the modelled physical  
 46 processes determining tracer concentration are similar to those determining expected neuston and plastic  
 47 densities, so that it makes sense to apply the same transformation to tracer concentration as to expected  
 48 neuston and plastic densities. The observation-level random effects  $\boldsymbol{\varepsilon}_i$  account for overdispersion, which  
 49 is likely to be important (for example, because slicks may concentrate floating objects in some areas much  
 50 more than others). The use of a regression model, with log tracer concentration  $x_i$  as a non-random  
 51 explanatory variable, addresses point 2. The use of a multivariate model, in which each neuston taxon

52 is distinguished, addresses point 3. The inclusion of the interaction term  $\beta_3 x_i p_i$  allows the relationship  
53 between tracer concentration and densities of neuston and plastic to differ between areas. Below, we  
54 show how to calculate the relationships between the logs of expected neuston and plastic densities over  
55 an area with a given distribution of tracer concentration, addressing point 4. We also show that these  
56 relationships are not affected by consistent study-specific biases, addressing point 5. We will develop a  
57 more detailed model of the measurement process below to address point 6.

## 58 **C Measurement process**

59 In our data, the material from each trawl sample was photographed, and visual counts of objects on  
60 each photograph were done independently by two observers. Not every site was photographed, due to  
61 operational constraints that occurred on a haphazard basis, such as availability of crew. However, we  
62 believe that this is unlikely to have led to systematic biases. To check this, we compared plastic densities  
63 for sites that were and were not photographed, over a subset of sites for which these densities were  
64 available from another source [5]. For 44 sites visited during the study (those coded SJR in the original  
65 data file), plastic particles were picked out, preserved and later counted by hand [5]. Of these 44, 8 were  
66 also photographed (and thus included in our data set), while 36 were not (Figure A).

67 We extracted data on total plastic densities from the supporting information of Egger et al. [5].  
68 There did not appear to be systematic differences in plastic density between sites that were or were not  
69 photographed (Figure B). The sample maximum was greater for those sites that were not photographed,  
70 but this is likely to be a consequence of the larger sample size of unphotographed sites.

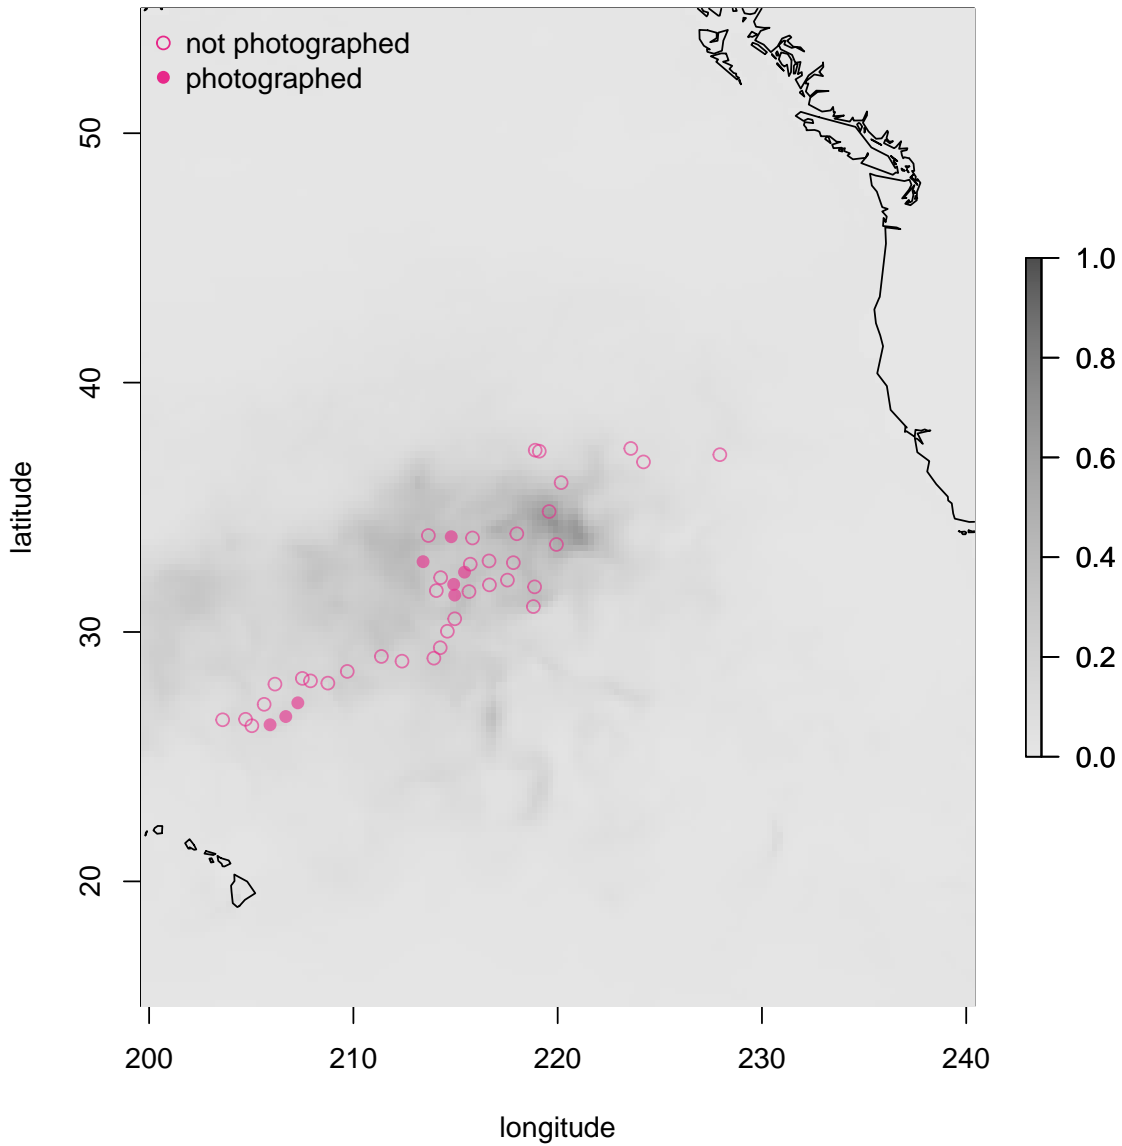

Figure A: Locations of 36 sites that were not photographed (open circles), and 8 that were (filled circles). Plastic counts for all these sites (but not for other sites in our data set), obtained by preserving and hand counting, were included in Egger et al. [5]. Shading represents dimensionless tracer concentration in July 2019. The data underlying this Figure can be found in S1 Data. Map created in R using the maps package (<https://cran.r-project.org/package=maps>) and Natural Earth data (<https://www.naturalearthdata.com/>).

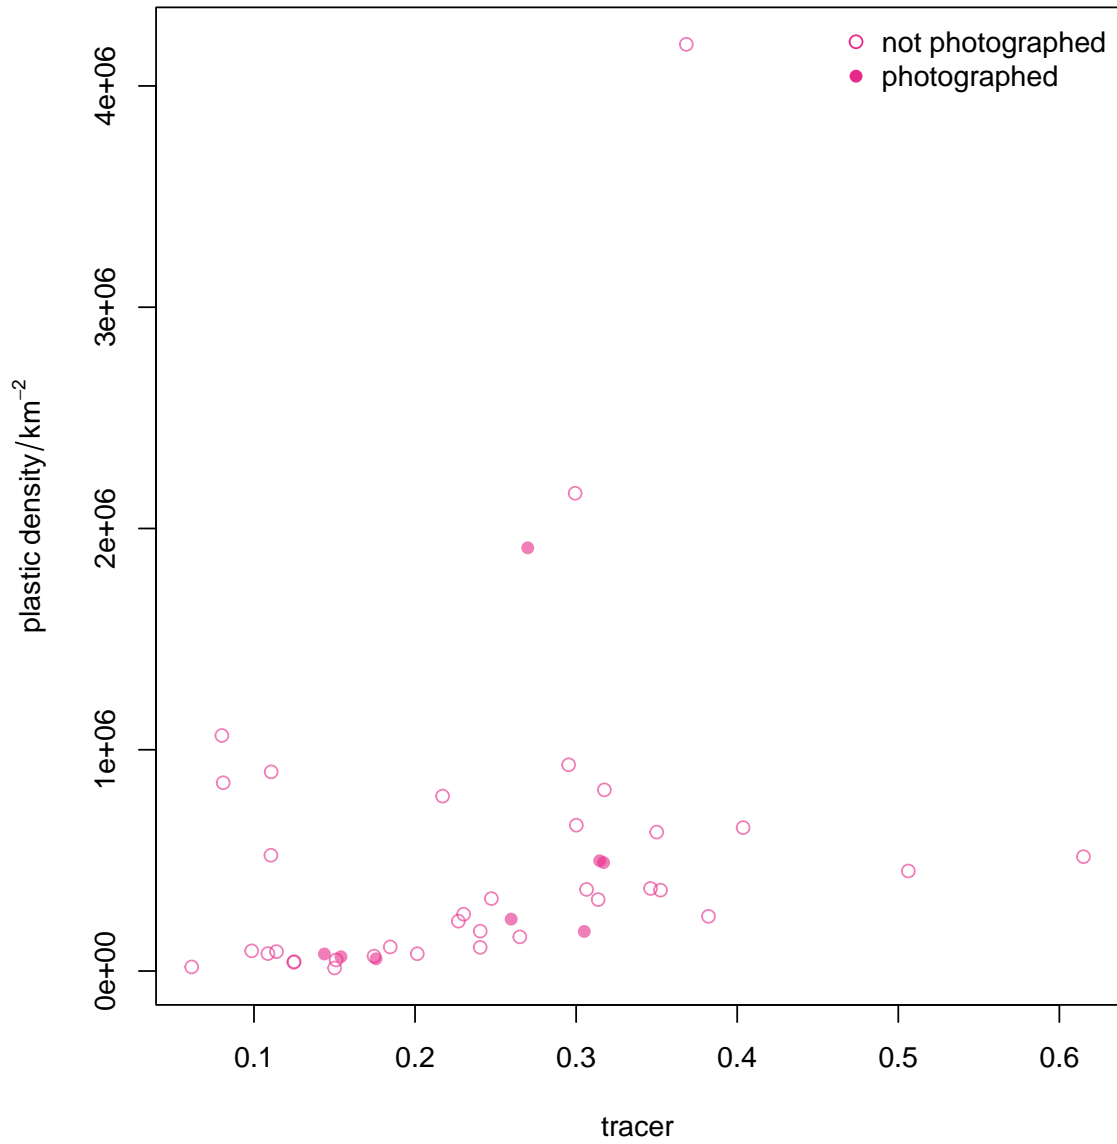

Figure B: Relationships between total plastic count per km<sup>2</sup> and dimensionless tracer concentration for 36 sites that were not photographed (open circles), and 8 that were (filled circles). Data from Egger et al. [5]. The data underlying this Figure can be found in S1 Data.

71 For those sites that were photographed, independent visual counts were made from the photographs  
 72 by two observers. There did not appear to be systematic differences between the observers (Figure C),  
 73 except that observer FC may have counted more *Janthina* than observer RH (Figure Cc). We assume  
 74 that the dominant mode of error in counting is failing to record every object in a given category, rather  
 75 than putting objects in the wrong categories. This is plausible given that the number of objects was  
 76 sometimes large, but the appearances of the different categories were relatively distinct.

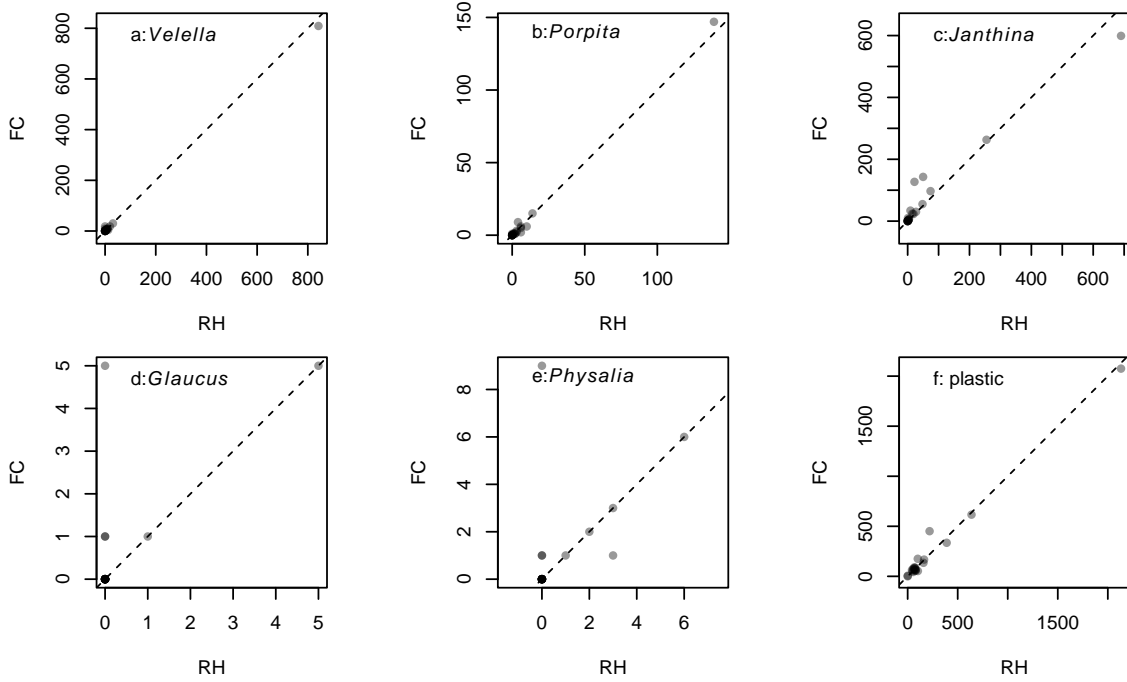

Figure C: Comparison of visual counts of a: *Verella*, b: *Porpita*, c: *Janthina*, d: *Glaucus*, e: *Physalia* and f: plastic in each trawl sample, by two observers (RH, FC). The dashed lines correspond to equal counts. Note the different axis scales on each panel. The data underlying this Figure can be found in S1 Data.

77 We model failure to record every object by assigning a detection probability  $\kappa_j$  to each category of  
 78 object. We assume that this probability is the same for both observers, and for every object in the  
 79 category. We first show how to determine the distribution of counts if there is only a single observer,  
 80 and then develop the corresponding results for two observers. We then suggest that the overall sampling  
 81 model for our data should be considered as a two-stage process, with the single-observer stage applying  
 82 to the number of potentially visible items on a photograph, and the two-observer stage applying to counts  
 83 from the photograph.

84 For a single observer, let  $z_{ij}$  be the count for category  $j$  in observation  $i$ . The corresponding Poisson-  
 85 distributed true count  $y_{ij}$  from Equation A is unobserved. The assumption of a constant  $\kappa_j$  leads to a  
 86 binomial distribution for the random variable  $Z_{ij}$  representing the observed count, conditional on the  
 87 true count. This is known as a binomial-Poisson hierarchy distribution [3, p. 163], for which the marginal

88 probability of observing count  $z_{ij}$  is:

$$\begin{aligned}
\mathbb{P}(Z_{ij} = z_{ij}) &= \sum_{k=0}^{\infty} \mathbb{P}(Z_{ij} = z_{ij} | Y_{ij} = k) \mathbb{P}(Y_{ij} = k) \\
&= \sum_{k=z_{ij}}^{\infty} \binom{k}{z_{ij}} \kappa_j^{z_{ij}} (1 - \kappa_j)^{k-z_{ij}} \frac{(a_i \lambda_{ij})^k e^{-a_i \lambda_{ij}}}{k!} \\
&= \frac{(a_i \kappa_j \lambda_{ij})^{z_{ij}} e^{-a_i \kappa_j \lambda_{ij}}}{z_{ij}!},
\end{aligned} \tag{B}$$

89 which is the probability of observing  $z_{ij}$  under a Poisson distribution with parameter  $a_i \kappa_j \lambda_{ij}$ . Because  
90 the detection probabilities  $\kappa_j$  only appear in a product with the rates  $\lambda_{ij}$ , only this product can be  
91 estimated. In other words, detection probabilities will be absorbed into the intercept  $\beta_0$  in Equation A,  
92 and cannot be estimated from a single-count study.

93 When there are two independent observers, let  $z_{1,ij}$  and  $z_{2,ij}$  be the counts for category  $j$  in obser-  
94 vation  $i$  by observers 1 and 2 respectively. These counts are conditionally independent, given the true  
95 number of the  $j$ th category in the  $i$ th observation. Thus the marginal probability of observing counts  
96  $(z_{1,ij}, z_{2,ij})$  is

$$\begin{aligned}
\mathbb{P}(Z_{1,ij} = z_{1,ij}, Z_{2,ij} = z_{2,ij}) &= \sum_{k=0}^{\infty} \mathbb{P}(Z_{1,ij} = z_{1,ij}, Z_{2,ij} = z_{2,ij} | Y_{ij} = k) \mathbb{P}(Y_{ij} = k) \\
&= \sum_{k=0}^{\infty} \mathbb{P}(Z_{1,ij} = z_{1,ij} | Y_{ij} = k) \mathbb{P}(Z_{2,ij} = z_{2,ij} | Y_{ij} = k) \mathbb{P}(Y_{ij} = k) \\
&= \sum_{k=z_{1,ij}}^{\infty} \binom{k}{z_{1,ij}} \kappa_j^{z_{1,ij}} (1 - \kappa_j)^{k-z_{1,ij}} \binom{k}{z_{2,ij}} \kappa_j^{z_{2,ij}} (1 - \kappa_j)^{k-z_{2,ij}} \frac{(a_i \lambda_{ij})^k e^{-a_i \lambda_{ij}}}{k!}.
\end{aligned} \tag{C}$$

98 This is a bivariate compound Poisson distribution with the detection probability  $\kappa_j$  the same for the two  
99 observers, for which

$$\mathbb{P}(Z_{1,ij} = z_{1,ij}, Z_{2,ij} = z_{2,ij}) = \exp[-a_i \lambda_{ij} (1 - (1 - \kappa_j)^2)] \sum_{k=0}^{\min(z_{1,ij}, z_{2,ij})} \frac{(a_i \lambda_{ij} \kappa_j (1 - \kappa_j)^{z_{1,ij} + z_{2,ij} - 2k} (a_i \lambda_{ij} \kappa_j^2)^k}{(z_{1,ij} - k)! (z_{2,ij} - k)! k!}.$$

100 [7]. Properties of this and related distributions are given in Johnson et al. [9, chapter 36, section 8]. Note  
101 that unlike the single-count model, the detection probabilities  $\kappa_j$  do not simply appear in a product with  
102 the rates  $\lambda_{ij}$ , suggesting that it may be possible to estimate the detection probabilities from a double-  
103 count study.

104 The overall sampling model should be interpreted as a two-stage process. The number of objects  
105 potentially visible on a photograph should be interpreted as being drawn from a binomial-Poisson hier-  
106 archy distribution (Equation B), conditional on the rate for the site, with detection probabilities that  
107 cannot be identified, leading to a Poisson distribution of potentially visible items on the photograph con-  
108 ditional on the rate. Conditional on the photograph, the distribution of the number of objects counted

109 by the observers will be bivariate compound Poisson (Equation C) with detection probabilities applying  
 110 to detection of objects on the photograph. Thus our full model, based on Equation A but with bivariate  
 111 compound Poisson observations, is

$$\begin{aligned}
 (z_{1,ij}, z_{2,ij}) &\sim \text{bivariate compound Poisson}(\kappa_j, a_i \lambda_{ij}), \\
 \lambda_{ij} &= e^{\eta_{ij}}, \\
 \eta_i &= \beta_0 + \beta_1 x_i + \beta_2 p_i + \beta_3 x_i p_i + \varepsilon_i, \\
 \varepsilon_i &\sim N(\mathbf{0}, \Sigma).
 \end{aligned}
 \tag{D}$$

## 112 D Conditional and marginal covariance

113 It is natural to work on the log scale, and study covariance of  $\eta$ . The conditional covariance of  $\eta_i$  given  
 114  $(p_i, x_i)$  is simply  $\Sigma$ .

115 To determine the marginal covariance between the logs of expected neuston and plastic densities over  
 116 some area  $\Omega$  with a given distribution of log tracer concentration and patch membership, let  $\mu_\eta$  be the  
 117 expected value of the linear predictor over this area:

$$\mu_\eta = \mathbf{B}\mu_X, \tag{E}$$

118 where  $\mathbf{B} = [\beta_0, \beta_1, \beta_2, \beta_3]$  is the  $m \times 4$  matrix whose columns are the coefficient vectors, and  $\mu_X =$   
 119  $[1, \mu_X, \mu_P, \mu_{XP}]^T$ , where  $\mu_X, \mu_P$  and  $\mu_{XP}$  are the means of log tracer, patch membership and the product  
 120 of log tracer and patch membership respectively, over the area of interest and  $T$  denotes transpose.  
 121 The deviation of any given  $\eta_i$  from the mean over the area is  $\eta_i - \mu_\eta = \mathbf{B}(X_i - \mu_X) + \varepsilon_i$ , where  
 122  $X_i = [1, x_i, p_i, x_i p_i]^T$ . The the marginal covariance matrix  $\Psi$  over this area is

$$\begin{aligned}
 \Psi &= \mathbb{E} [(\eta_i - \mu_\eta)(\eta_i - \mu_\eta)^T] \\
 &= \mathbb{E} [(\mathbf{B}(X_i - \mu_X) + \varepsilon_i)(\mathbf{B}(X_i - \mu_X) + \varepsilon_i)^T] \\
 &= \mathbf{B} \mathbb{V}(X) \mathbf{B}^T + \Sigma \\
 &= \mathbf{B}_{-1} \mathbb{V}(X_{-1}) \mathbf{B}_{-1}^T + \Sigma,
 \end{aligned}
 \tag{F}$$

123 where  $\mathbf{B}_{-1} = [\beta_1, \beta_2, \beta_3]$  is the coefficient vector with the intercept  $\beta_0$  dropped,  $X_{-1} = [x_i, p_i, x_i p_i]^T$   
 124 is the vector of explanatory variables excluding the constant element 1, and  $\mathbb{V}(X_{-1})$  is the covariance  
 125 matrix of this vector over the area of interest. Note that because the intercept effect is constant over  
 126 the area, it has no effect on the marginal covariance. Thus study-specific biases in sampling that lead to  
 127 consistent over- or under-counting of particular components are irrelevant.

128 If we wish to aggregate neuston taxa into a vector  $\eta_A$  of total log neuston and log plastic, we can



129 write

$$130 \quad \boldsymbol{\eta}_A = \mathbf{A}\boldsymbol{\eta},$$

131 where  $\mathbf{A}$  is the  $2 \times m$  matrix

$$132 \quad \mathbf{A} = \begin{bmatrix} 1 & 1 & \dots & 1 & 0 \\ 0 & 0 & \dots & 0 & 1 \end{bmatrix}.$$

133 Then the covariance matrix  $\boldsymbol{\Psi}_A$  of total log neuston and log plastic is

$$\begin{aligned} \boldsymbol{\Psi}_A &= \mathbf{A}\boldsymbol{\Psi}\mathbf{A}^T \\ &= \mathbf{A}\mathbf{B}_{-1}\mathbf{V}(X_{-1})\mathbf{B}_{-1}^T\mathbf{A}^T + \mathbf{A}\boldsymbol{\Sigma}\mathbf{A}^T, \end{aligned} \tag{G}$$

134 which again is unaffected by study-specific biases that lead to consistent over- or under-counting of  
 135 particular components. Total log neuston is proportional to the log of the geometric mean of neuston  
 136 densities, and is not equal to the log of total neuston (for which there will not be a similarly simple  
 137 expression for marginal covariance with log plastic).

## 138 E Tracer regions

139 The marginal correlation calculations in section D depend on appropriate choices of region. We want to  
 140 avoid extrapolating too far beyond the geographical area in which observations were taken, or the range  
 141 of tracer concentrations over these observations. Here, we describe how we achieved this.

142 Let  $\mathcal{R}$  be the smallest rectangle of latitude and longitude, aligned with the longitude axis, that  
 143 encloses the sites at which observations were made. We assume that these sites have been divided *a*  
 144 *priori* into those inside and those outside the patch. Let  $\Omega_{\text{all}} = \{r \in \mathcal{R} : x_r \geq m_{\text{all}}\}$ , where  $m_{\text{all}}$  is the  
 145 minimum log tracer concentration over all the sites at which observations were made (Figure D, region  
 146 bounded by dashed line). Similarly, let  $\Omega_{\text{in}} = \{r \in \mathcal{R} : x_r \geq m_{\text{in}}\}$ , where  $m_{\text{in}}$  is the minimum log tracer  
 147 concentration over all the sites that lie within the patch (Figure D, region bounded by solid lines). Then  
 148 let  $\Omega_{\text{out}} = \Omega_{\text{all}} \setminus \Omega_{\text{in}}$ . Note that these regions are not necessarily either simply connected or connected  
 149 (and in fact  $\Omega_{\text{in}}$  and  $\Omega_{\text{out}}$  are neither).

150 The regions  $\Omega_{\text{all}}$  and  $\Omega_{\text{in}}$  contain tracer concentrations greater than those at any of our observations.  
 151 We therefore also considered versions in which cells with tracer concentrations above the maximum at  
 152 any of our observations were removed. However, the results from these were almost indistinguishable  
 153 from those with the regions defined as above, so we do not report them here.

154 In practice, tracer concentrations were available on a grid of cells with latitude and longitude res-  
 155 olution  $0.25^\circ$ , and therefore not of equal area. Thus, within each region, the means and variances in  
 156 Equations E, F and G were weighted by cell area. Tracer concentrations for observations were taken as

157 those in the grid cells corresponding to the start location of each trawl.

## 158 **F Priors**

159 We used Bayesian methods to fit the model defined by Equation D. Here, we describe the prior distri-  
160 bution for each parameter.

161 For the intercept  $\beta_0$ , it is thought that *Porpita* can reach densities of up to 2 individuals  $\text{m}^{-2}$ , and  
162 that it, along with *Velella*, is among the neuston taxa that can achieve the highest densities [12, p. 395].  
163 Thus, log densities in  $\text{km}^{-2}$  as high as 14.5 are plausible. However, in unsuitable conditions very low  
164 densities of less than one individual  $\text{km}^{-2}$  are also plausible. We therefore chose independent  $N(0, 7.5)$   
165 priors on the elements of  $\beta_0$  (throughout, we parametrize univariate normal distributions by standard  
166 deviation rather than variance).

167 For the effect  $\beta_1$  of log tracer concentration, it seems plausible on physical grounds that the relation-  
168 ship between tracer concentration and densities of plastic and neuston could be close to linear. Thus 1 is  
169 a plausible value for the elements of  $\beta_1$ . Values close to 0 are also plausible, if the tracer model does not  
170 correctly capture the processes determining plastic and neuston densities. Values higher than 2 would  
171 be surprising, because there is little physical reason to expect quadratic or higher-powered polynomial  
172 relationships. We therefore chose independent  $N(0, 1)$  priors on the elements of  $\beta_1$ .

173 For the effect  $\beta_2$  of patch, we think that up to 1000-fold differences in density (approximately 6.9 on  
174 the natural log scale) between locations inside and outside the patch might be plausible, but no difference  
175 is also plausible once tracer concentration has been accounted for. We therefore chose independent  $N(0, 4)$   
176 priors on the elements of  $\beta_2$ .

177 For the coefficient  $\beta_3$  of the interaction between tracer and patch, both 0 and 1 should be plausible,  
178 but values higher than 2 would be surprising, as for the tracer effect. We therefore chose independent  
179  $N(0, 1)$  priors on the elements of  $\beta_3$ .

180 We have little information on the detection probabilities  $\kappa_i$ , but they can only be between 0 and 1.  
181 We therefore chose independent flat Beta(1, 1) priors on each  $\kappa_i$ .

182 For the covariance matrix  $\Sigma$  of observation-level random effects, we followed a common approach to  
183 priors for multivariate hierarchical models [13, section 1.13]. We decomposed the prior into a diagonal  
184 matrix of coefficient scales and a correlation matrix. For the scales, we chose independent weakly-  
185 informative independent half-Cauchy(0, 2.5) priors. For the correlation matrix, we chose an LKJ prior  
186 with shape parameter 2, which weakly concentrates around the identity matrix [10].

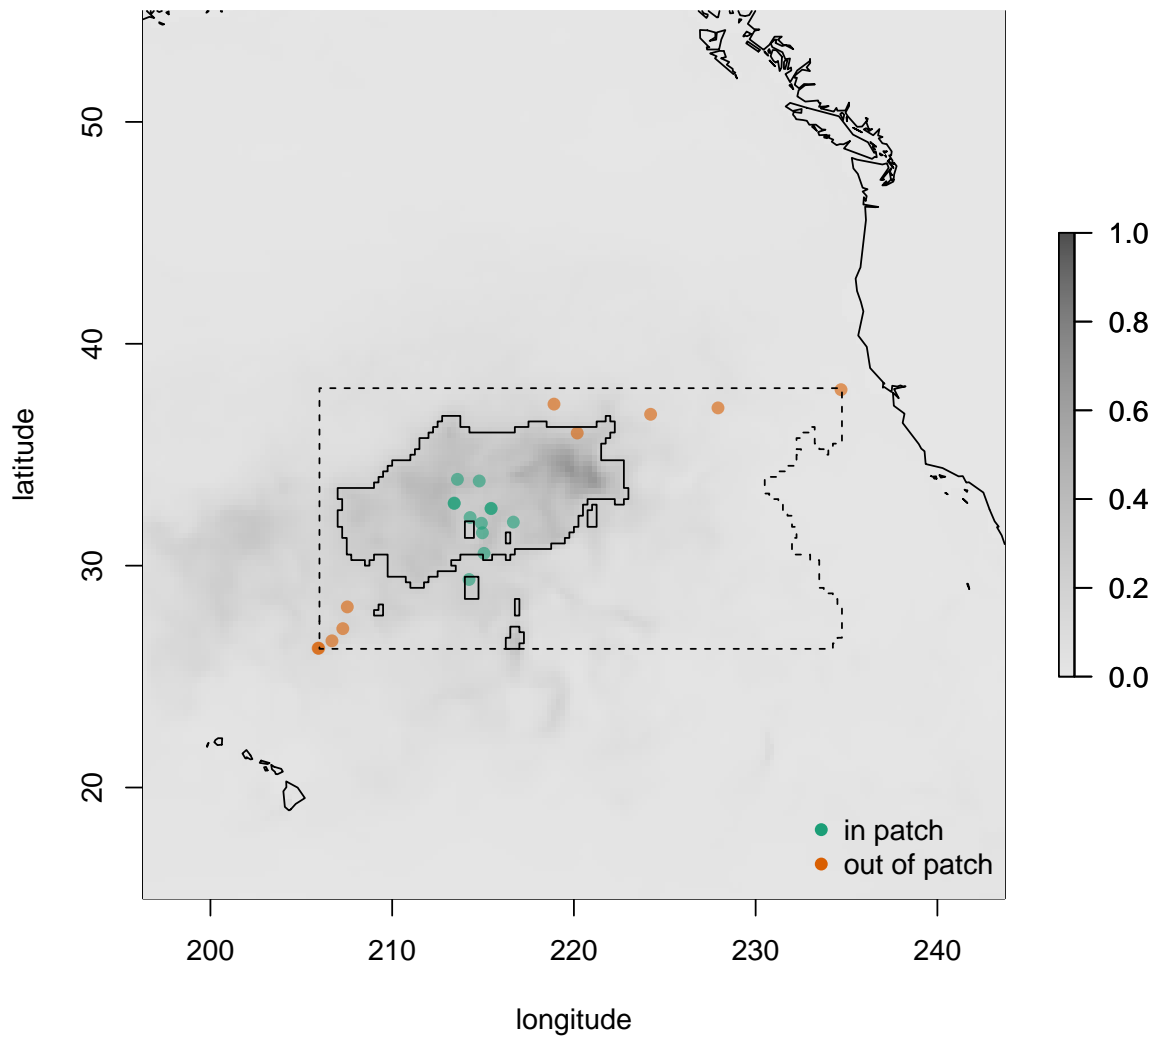

Figure D: Dimensionless tracer concentration (shading) and locations of observations in the North Pacific. Orange points lie outside the patch, and green points inside (as defined *a priori*). The dashed line encloses the region  $\Omega_{all}$ , containing all points with tracer concentration as least as large as the minimum over all sites at which observations were made, and within the smallest rectangle  $\mathcal{R}$  of latitude and longitude, parallel with the longitude axis, that just encloses the sites at which observations were made. Solid lines enclose the region  $\Omega_{in}$ , containing all points in  $\mathcal{R}$  with tracer concentrations at least as large as the minimum over all sites at which observations were made within the patch. Note that  $\Omega_{in}$  is neither simply connected nor connected. The data underlying this Figure can be found in S1 Data. Map created in R using the maps package (<https://cran.r-project.org/package=maps>) and Natural Earth data (<https://www.naturalearthdata.com/>).

## 187 G Estimation

188 We fitted the model defined by Equation D with priors as in Section F using the NUTS algorithm [8],  
189 implemented in the R package `rstan` version 2.21.5 [14], with data preparation and post-processing done  
190 in R version 4.2.1 [11]. We ran 4 chains for 2000 warmup and 2000 sampling iterations each. This took  
191 approximately 5 h on a 64-bit Ubuntu 20.04.4 system with 4 Intel Core i7-4600M 2.9 GHz cores and  
192 15.3 GiB RAM. We set the maximum tree depth to 20 and the `adapt_delta` parameter to 0.95, as these  
193 choices helped to avoid divergent transitions in preliminary versions of the model. Effective sample size  
194 was at least 3399, and the  $\hat{R}$  statistic was no larger than 1.0014, for all parameters. Inspection of trace  
195 plots did not suggest any obvious problems with convergence.

## 196 H Visualization

197 To visualize the relationship between log density and log tracer concentration, we plotted the log of  
198 observed density (number of objects  $\text{km}^{-2}$ ) for each category of object against the log of tracer con-  
199 centration for each observation. We plotted densities rather than counts to correct for differences in  
200 trawled area among observations. Observed densities were calculated from the mean of the two in-  
201 dependent counts for each observation. Where both counts were zero, we plotted the point on the  
202  $x$ -axis. We added lines (with equal-tailed 95% credible bands) representing the posterior mean pre-  
203 dicted density, corrected for detectability, conditional on log tracer concentration and patch member-  
204 ship:  $\log \kappa + \beta_0 + \beta_1 x + \beta_2 p + \beta_3 xp$ . We corrected for detectability by including  $\log \kappa$ , because observed  
205 densities will be affected by detectability.

206 To understand the effects of increased log tracer concentration on log density inside and outside  
207 the patch in more detail, we plotted the posterior distributions of  $\beta_1 + \beta_3$  and  $\beta_1$  respectively, and  
208 calculated the posterior probabilities that these effects were positive. Values of particular interest are  
209 0 (no relationship between log density and log tracer) and 1 (density proportional to tracer, expected  
210 on physical grounds if the tracer model captures the processes affecting density). These values were  
211 indicated on the plots.

212 To visualize the difference in predicted log density between inside-patch and outside-patch regions,  
213 we calculated expected log densities  $\mu_{\text{in}}$  and  $\mu_{\text{out}}$  over the inside- and outside-patch regions:

$$\begin{aligned} \mu_{\text{in}} &= \mathbb{E}_{\Omega_{\text{in}}}[\beta_0 + \beta_2 + (\beta_1 + \beta_3)x], \\ \mu_{\text{out}} &= \mathbb{E}_{\Omega_{\text{out}}}[\beta_0 + \beta_1 x], \end{aligned}$$

215 where the expectations were weighted by cell area. Then the difference in predicted log density is  
216  $\Delta = \mu_{\text{in}} - \mu_{\text{out}}$ . For each category, we plotted the posterior distribution of this difference (as a kernel

217 density estimate), and calculated the posterior probability that the difference was positive.

218 To visualize the marginal relationships between log densities of each taxon and plastic, we calculated  
219 the marginal covariances between log density of each taxon and log plastic density, and between total  
220 log neuston and log plastic, using Equations F and G respectively, and standardized to correlations  $\rho$ .  
221 We did these calculations for the three regions  $\Omega_{\text{all}}$ ,  $\Omega_{\text{in}}$  and  $\Omega_{\text{out}}$ . We plotted the posterior distributions  
222 of these correlations (as kernel density estimates), and calculated the posterior probability that each  
223 correlation was positive.

224 For differences in predicted log density between inside-patch and outside-patch regions, and marginal  
225 correlations, we determined how much information there was in the data by plotting the prior distri-  
226 butions of these statistics, and comparing them visually with the posterior distributions. We estimated  
227 prior distributions by taking a sample (of the same size as the posterior sample) from the priors for each  
228 parameter in Stan using the `Fixed_param` algorithm, and then applying the same calculations to this  
229 prior sample as to the posterior sample.

## 230 I Checks on estimation method, model plausibility and perfor- 231 mance

232 We checked whether the detectability parameters  $\kappa$  can be estimated from these data (and thus whether  
233 there is absolute density information) by examining scatter plots of the bivariate posterior distributions  
234 of the elements of  $\beta_0$  against the corresponding elements of  $\log \kappa$ . Equation C suggests that in principle  
235 it may be possible to estimate detectability. However, it seems likely that at least to some extent, a  
236 high intercept could compensate for low detectability, and vice versa. Thus, strong negative relationships  
237 between corresponding elements of  $\beta_0$  and  $\log \kappa$  would suggest difficulties in estimating detectability. The  
238 Hessian of the log of the probability mass function can also given information on this [4]. If increases in  
239 the intercept can completely compensate for decreases in detectability, the log probability mass function  
240 will have a ridge of constant values along a negative relationship between log detectability and the  
241 intercept. If this happens, the Hessian will not be of full rank. We therefore evaluated the Hessian of the  
242 log of the probability mass function for counts (Equation C) with respect to  $\kappa_j$  and  $a_i \lambda_{ij}$ , at posterior  
243 mean estimates. If detectabilities cannot be estimated, we will not have information on absolute densities  
244 (but note that the statistics of interest do not depend on absolute densities).

245 We checked the ability of the estimation method to recover known parameters by generating 10  
246 simulated data sets from Equation D, with the same values of explanatory variables as the real data,  
247 and each parameter set to its posterior mean. We then estimated parameters from the simulated data  
248 sets as above, except that we used `cmdstan` 2.30.1 [2] rather than `rstan`, for ease of automation via a  
249 bash script. We plotted posterior densities for each parameter from each simulated data set, with true

250 parameters and prior densities indicated on the plots. We also calculated the proportion of simulated  
 251 data sets for which the 95% highest posterior density interval for each parameter contained the true  
 252 value. This approach will help to rule out major errors in coding, and will give a rough idea of whether  
 253 the estimation method is working, but cannot tell us whether the estimated posterior densities are  
 254 exactly correct. Computation took approximately 60 h on a 64-bit Ubuntu 20.04 system with 4 Intel  
 255 Xeon 3.2 GHz cores and 16 GiB RAM. Ideally, we would have used simulation-based calibration [15] to  
 256 determine whether the entire posterior densities are correct, but this would have been too time-consuming  
 257 given the length of time needed to estimate parameters from a single data set.

258 We carried out a graphical posterior predictive check on the plausibility of the model. For each of 200  
 259 iterations, we generated a simulated data set with the same values of explanatory variables as the real  
 260 data, and a set of parameter values drawn from the posterior distribution. We plotted the relationship  
 261 between log density and log tracer concentration in the same way as for the observed data. Systematic  
 262 differences between the observed and simulated relationships will indicate ways in which the model fails.

263 As an additional posterior predictive check, we examined the correlation between the counts from  
 264 each observer for each taxon. This correlation is a key feature of the bivariate count distribution that is  
 265 not captured by the relationship between log density and log tracer concentration. We therefore plotted  
 266 the posterior predictive distribution of this correlation for each taxon from each of 200 iterations, and  
 267 overlaid the observed correlation.

268 We used leave-one-out cross-validation to estimate the out-of-sample predictive performance of the  
 269 model. Let  $f(\mathbf{z}_{1,l}, \mathbf{z}_{2,l})$  be the predictive density for the  $l$ th observation (consisting of a pair of count  
 270 vectors  $\mathbf{z}_{1,l}$  and  $\mathbf{z}_{2,l}$ ), and let  $\boldsymbol{\theta}_{-l}$  be the posterior density of the full set of parameters estimated from  
 271 all observations other than  $l$ . For each of 1000 draws from this leave-one-out density, we estimated the  
 272 log predictive density of the new observation  $l$ , integrated over the distribution of the observation-level  
 273 random effect  $\boldsymbol{\varepsilon}_l$ :

$$274 \int \log f(\mathbf{z}_{1,l}, \mathbf{z}_{2,l} | \boldsymbol{\eta}_l, a_l, x_l, p_l, \boldsymbol{\kappa}) f(\boldsymbol{\eta}_l | \boldsymbol{\varepsilon}_l, \boldsymbol{\theta}_{-l}) f(\boldsymbol{\varepsilon}_l | \boldsymbol{\theta}_{-l}) d\boldsymbol{\varepsilon}.$$

275 We estimated this integral by classical Monte Carlo, with a sample size of  $1 \times 10^5$ . We plotted the  
 276 distribution of these estimates of log predictive density for each observation. Observations which are  
 277 unusual given the rest of the data are likely to have low log predictive density and may indicate ways  
 278 in which the model is inadequate. This computation took approximately 66 h on a 64-bit Ubuntu 20.04  
 279 system with 4 Intel Xeon 3.2 GHz cores and 16 GiB RAM to re-fit the model to each leave-one-out  
 280 data set, followed by approximately 12 h on a 64-bit Ubuntu 20.04.4 system with 4 Intel Core i7-4600M  
 281 2.9 GHz cores and 15.3 GiB RAM to integrate over the distribution of  $\boldsymbol{\varepsilon}$ . Popular methods such as  
 282 Pareto-smoothed importance sampling [16] would be much faster, but are not available for our model  
 283 because of the observation-level random effects.

## 284 J Analysis of Egger et al. [6] data

285 Egger et al. [6] report data from a similar survey in the North Pacific. They collected data from 54  
 286 trawls, of which 9 were taken in 2015 and 45 in 2019. Here, we follow Egger et al. [6] in ignoring the  
 287 differences among years. They classified their sites *a priori* into three areas  $A$ ,  $B$  and  $C$  based on their  
 288 own modelled plastic concentrations, with  $A$  having the lowest modelled plastic concentrations and  $C$  the  
 289 highest. The contents of trawls were frozen and later counted by hand in the laboratory. We analyzed  
 290 these data using a model based on Equation A:

$$\begin{aligned}
 y_{ij} &\sim \text{Poisson}(a_i \lambda_{ij}), \\
 \lambda_{ij} &= e^{\eta_{ij}}, \\
 \eta_i &= \beta_0 + \beta_1 x_i + \beta_B p_{B,i} + \beta_C p_{C,i} + \beta_{1,B} x_i p_{B,i} + \beta_{1,C} x_i p_{C,i} + \varepsilon_i, \\
 \varepsilon_i &\sim N(\mathbf{0}, \Sigma).
 \end{aligned}
 \tag{H}$$

291 Here,  $p_B$  and  $p_C$  are indicator variables for being in areas  $B$  and  $C$  respectively, with associated coeffi-  
 292 cients  $\beta_B$  and  $\beta_C$ , and coefficients of interactions with log tracer concentration  $\beta_{1,B}$  and  $\beta_{1,C}$ . Detectabil-  
 293 ity effects such as degradation of organisms in frozen samples could be modelled as a binomial-Poisson  
 294 hierarchy, for which the detectability parameters cannot be identified (Equation B), and thus do not  
 295 lead to any change in model structure compared to Equation A. Locations were clustered, with sets of  
 296 3 trawls taken close together in 2019, and sets of 1 or 2 trawls taken close together in 2015. Here, we  
 297 ignore this clustering for simplicity, although it might be more appropriate to introduce an additional  
 298 cluster-level random effect to account for this.

299 We defined tracer regions using a similar approach to section E. We took the geographical region  
 300  $\mathcal{R}$  to be the smallest rectangle of latitude and longitude, aligned with the longitude axis, that enclosed  
 301 all the observations from both years (because the model was fitted to all these data). We selected  
 302 the minimum tracer concentrations defining each region based on data from each year in turn, but  
 303 did subsequent calculations using only the 2019 regions, because most of the observations were from  
 304 2019. Let  $\Omega_{\text{all}} = \{r \in \mathcal{R} : x_{r,2019} \geq m_{\text{all}}\}$ , where  $x_{r,2019}$  is the log tracer concentration in cell  $r$  in  
 305 2019 and  $m_{\text{all}}$  is the lowest log tracer concentration over any observation in 2019 (Figure Ea, region  
 306 bounded by dotted line). Let  $\Omega_C = \{r \in \mathcal{R} : x_{r,2019} \geq m_C\}$ , where  $m_C$  is the minimum log tracer  
 307 concentration over any observation in area  $C$  in 2019 (Figure Ea, region bounded by solid lines). Let  
 308  $\Omega_{BC} = \{r \in \mathcal{R} : x_{r,2019} \geq m_B\}$ , where  $m_B$  is the minimum log tracer concentration over any observation  
 309 in areas  $B$  or  $C$  in 2019 (Figure Ea, region bounded by dashed lines). Then let  $\Omega_A = \Omega_{\text{all}} \setminus \Omega_{BC}$  and  
 310  $\Omega_B = \Omega_{BC} \setminus \Omega_C$ . We computed marginal correlations over the regions  $\Omega_{\text{all}}$ ,  $\Omega_C$ ,  $\Omega_B$  and  $\Omega_A$  for 2019.  
 311 Similar regions were defined for 2015 (Figure Eb), but were not used in subsequent calculations (and in  
 312 fact all observations in 2015 were from area  $C$ , so these regions coincide).

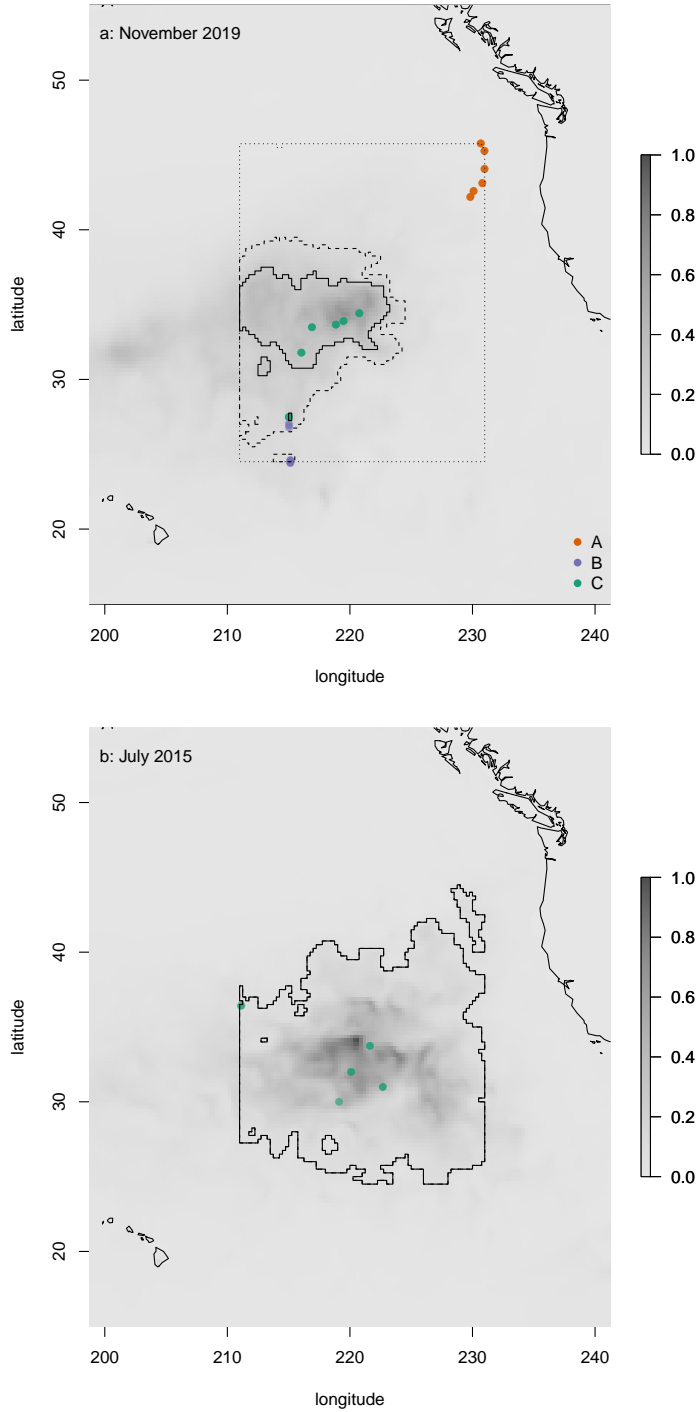

Figure E: Dimensionless tracer concentration (shading) and locations of observations in the North Pacific for the Egger et al. [6] data from (a) November 2019 and (b) July 2015. Orange points are area  $A$ , purple area  $B$  and green area  $C$  (as defined *a priori*). Dotted lines enclose the region  $\Omega_{\text{all}}$  for each year, containing all points with tracer concentration as least as large as the minimum over all sites at which observations were made in any year, and within the smallest rectangle  $\mathcal{R}$  of latitude and longitude, parallel with the longitude axis, that just encloses the sites at which observations were made. Dashed lines enclose the region  $\Omega_{BC}$ , containing all points in  $\mathcal{R}$  with tracer concentrations at least as large as the minimum over all sites at which observations were made within areas  $B$  or  $C$  in any year. Solid lines enclose the region  $\Omega_C$ , containing all points in  $\mathcal{R}$  with tracer concentrations at least as large as the minimum over all sites at which observations were made within area  $C$  in any year. Note that in 2015, the only observations were in area  $C$ , so these three regions coincide. The data underlying this Figure can be found in S1 Data. Maps created in R using the maps package (<https://cran.r-project.org/package=maps>) and Natural Earth data (<https://www.naturalearthdata.com/>).



313 We used similar prior choices to those given in section F. For all the parameters also appearing in  
314 section F, we used the prior choices given there. For the patch effects  $\beta_B$  and  $\beta_C$  we used independent  
315  $N(0, 4)$  priors, as for the patch effect  $\beta_2$  in section F. For the interaction effects  $\beta_{1,B}$  and  $\beta_{1,C}$ , we used  
316 independent  $N(0, 1)$  priors, as for the interaction effect  $\beta_3$  in section F.

317 Estimation was as in section G, except that we ran for 4000 warmup and 4000 sampling iterations  
318 to get sufficient effective sample size for parameters associated with the elements of  $\Sigma$ . This took  
319 approximately 1.5 h on an Ubuntu 20.04.4 system with 4 Intel Core i7-4600M 2.9 GHz cores and 15.3 GiB  
320 RAM. Effective sample size was 887 for one of the parameters associated with  $\Sigma$ , but greater than 1000  
321 for all others. The  $\hat{R}$  statistic was no larger than 1.0042 for all parameters. Inspection of trace plots did  
322 not suggest any obvious problems with convergence.

323 We visualized results using a similar approach to that taken for the Vortex Swim data. We produced  
324 plots of the relationship between log density and log tracer concentration as in Section H, but with three  
325 regions  $A$ ,  $B$  and  $C$  instead of inside- and outside-patch regions. We plotted posterior distributions of  
326 tracer effects for these three regions:  $\beta_1$  in region  $A$ ,  $\beta_1 + \beta_{1B}$  in region  $B$ , and  $\beta_1 + \beta_{1C}$  in region  $C$ . We  
327 plotted posterior distributions of differences in expected log density between regions  $C$  and  $B$  ( $\Delta_{CB}$ ),  
328 and between regions  $B$  and  $A$  ( $\Delta_{BA}$ ).

## 329 K Results

330 The relationship between log density of each category of object and log tracer concentration was generally  
331 positive (Figure F, slopes), and for *Verella*, *Porpita* and *Janthina*, there was also a clear positive effect of  
332 being in the patch (Figure Fa, b and c, orange vs. green). For *Glaucus* and *Physalia*, there were many  
333 zero counts (Figure Fd and e, vertical lines on  $x$ -axis) and the posterior mean relationship fell clearly  
334 below the points with non-zero counts. This does not indicate that the model fits these observations  
335 poorly, rather that estimates of true density are reduced by observations with zero counts. Posterior  
336 distributions for all parameters are summarized in Table A.

337 The posterior distributions of elements of the log tracer effect outside the patch ( $\beta_1$ ) were mainly  
338 positive for *Porpita*, *Janthina* and plastic (Figure Gb, c, f, orange) and more likely to be positive than  
339 negative for *Verella* and *Physalia* (Figure Ga, e, orange). On physical grounds, we would have expected  
340 values between 0 (no effect) and 1 (densities proportional to tracer). Somewhat surprisingly, the posterior  
341 mode for plastic exceeded 1 (Figure Gf), and values greater than 1 were not unlikely for all categories.  
342 For *Glaucus*, negative and positive effects were about equally likely (Figure Gd, orange). Effects inside  
343 the patch ( $\beta_1 + \beta_3$ ) were somewhat less likely to be positive for all categories (Figure G, green), although  
344 the posterior mode for *Janthina* exceeded 1 (Figure Gc, green). However, as noted below, there may be  
345 little information about the interaction effect  $\beta_3$  in data sets with this structure.

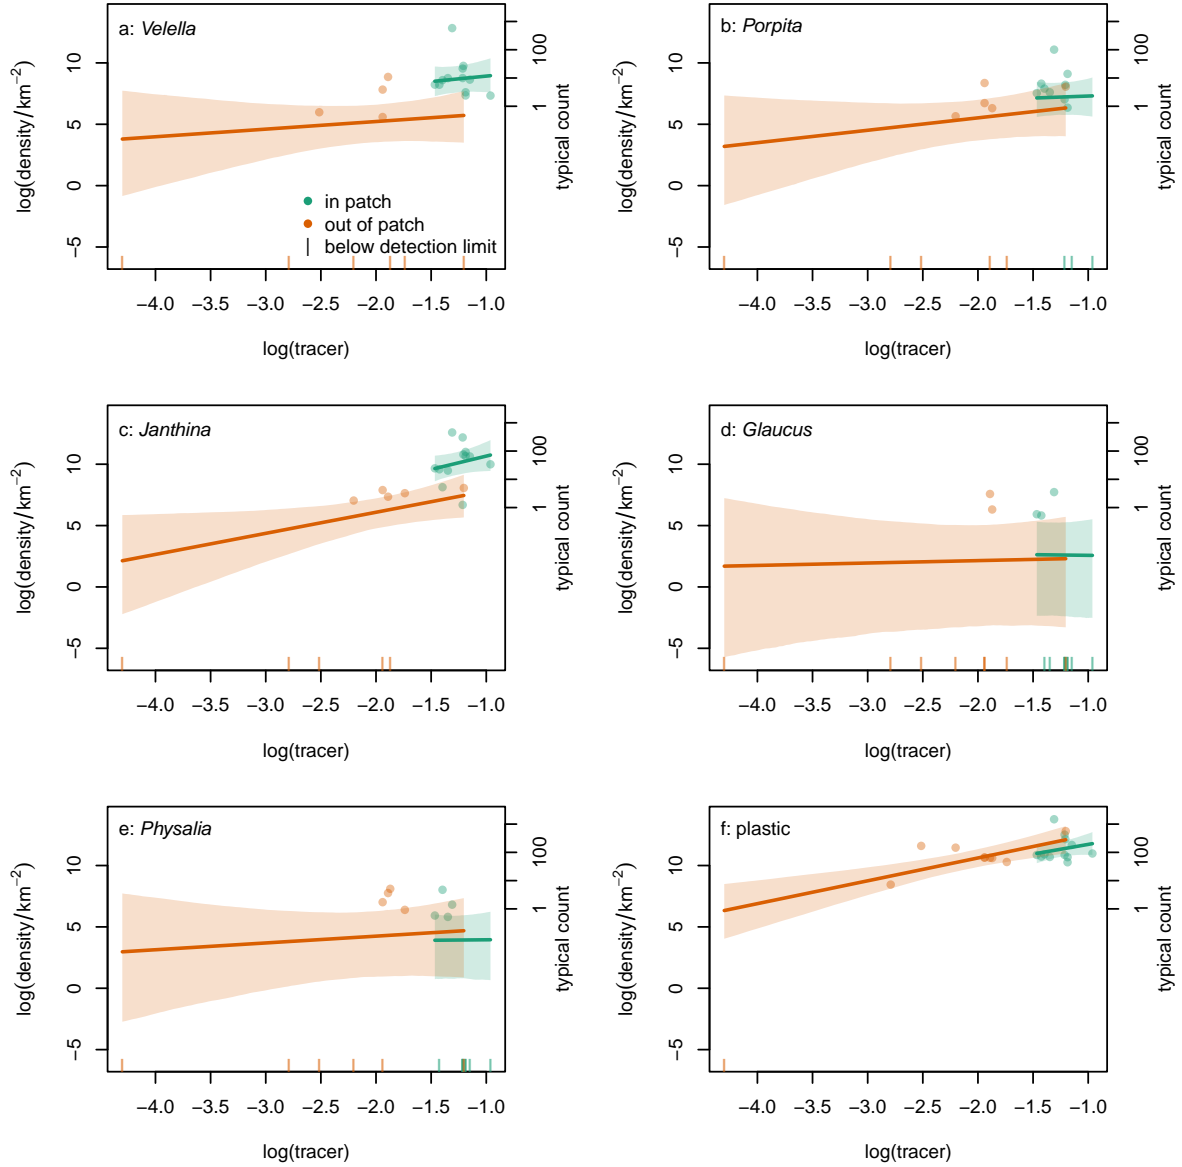

Figure F: Relationship between natural log of density (in numbers  $\text{km}^{-2}$ ) and natural log of tracer concentration (relative to its maximum over July 2015, July 2019 and November 2019) for (a) *Verella*, (b) *Porpita*, (c) *Janthina*, (d) *Glaucus*, (e) *Physalia* and (f) plastic outside (orange) and in (green) the patch. Points are sample means from two independent counts, with zeros plotted as vertical lines on the  $x$ -axis (note that models were fitted to the two counts, not the mean densities). Lines are posterior means, with 95% equal-tailed credible bands, and include the detectability parameters  $\kappa_i$ . The right-hand  $y$ -axis has tick marks at the log densities corresponding to counts of 1, 10, 100 and 1000 objects in the mean trawled area. The data underlying this Figure can be found in S1 Data.

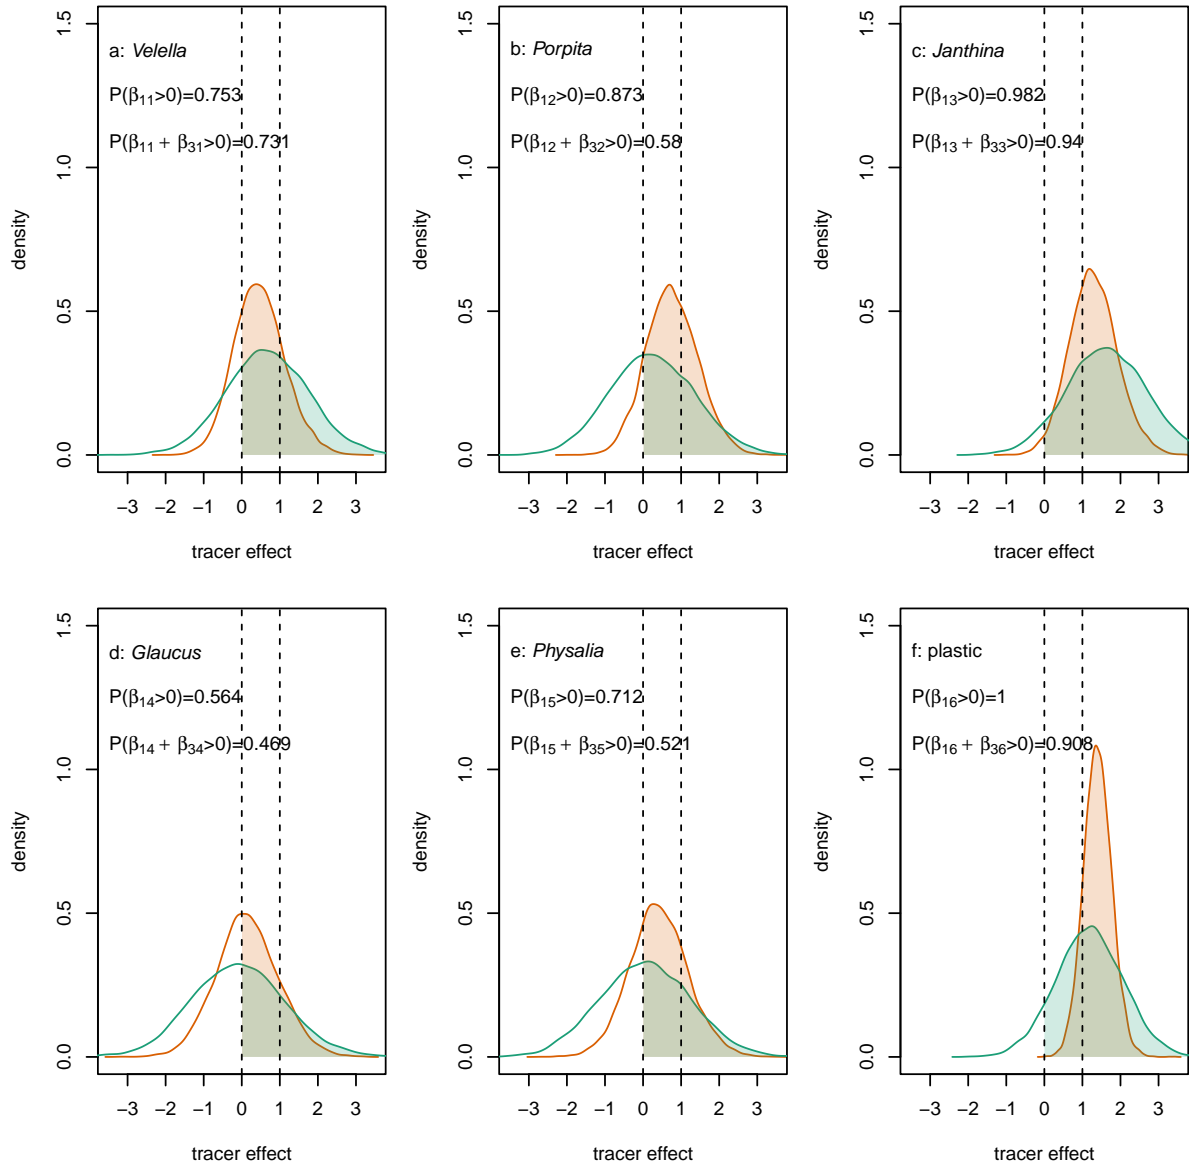

Figure G: Effect of (centered and scaled) natural log tracer concentration on expected natural log of density (in numbers  $\text{km}^{-2}$ ) for (a) *Verella*, (b) *Porpita*, (c) *Janthina*, (d) *Glaucus*, (e) *Physalia* and (f) plastic outside (orange,  $\beta_{1,i}$ ) and in (green,  $\beta_{1,i} + \beta_{3,i}$ ) the patch. Kernel density estimates of posterior distributions, with posterior probability that the effect is positive given on each panel. Vertical dashed lines at 0 and 1, physically important values for the effect. The data underlying this Figure can be found in S1 Data.

346 Averaged over tracer concentrations, expected natural log of density was almost certainly higher in  
347 the inside-patch region  $\Omega_{\text{in}}$  than in the outside-patch region  $\Omega_{\text{out}}$  for *Velella*, *Porpita*, *Janthina* and  
348 plastic (Figure Ha, b, c, f). For the rarely-captured taxa *Glaucus* and *Physalia*, the difference between  
349 inside- and outside-patch regions was centred on zero (Figure Hd and e). However, for all taxa, the  
350 posterior distribution of differences was substantially more concentrated than the prior distribution, so  
351 there was information in the data about these differences (Figure H, solid vs. dotted lines).

352 The posterior distributions of marginal correlations over the entire region  $\Omega_{\text{all}}$  between log plastic  
353 density and the log densities of *Velella*, *Porpita* and *Janthina* were almost entirely positive (Figure Ia to  
354 c). For the rare taxa *Glaucus* and *Physalia*, negative and positive marginal correlations with log plastic  
355 were about equally likely, and the posterior distribution was only slightly more concentrated than the  
356 prior, suggesting that there was little information in these data about correlations for these taxa (Figure  
357 Id and e, solid vs. dotted lines). The posterior distribution of the marginal correlation between log  
358 plastic density and total log neuston was almost entirely positive (Figure If). The qualitative pattern  
359 was the same for the inside-patch ( $\Omega_{\text{in}}$ ) and outside-patch ( $\Omega_{\text{out}}$ ) regions considered separately (Figures  
360 J and K).

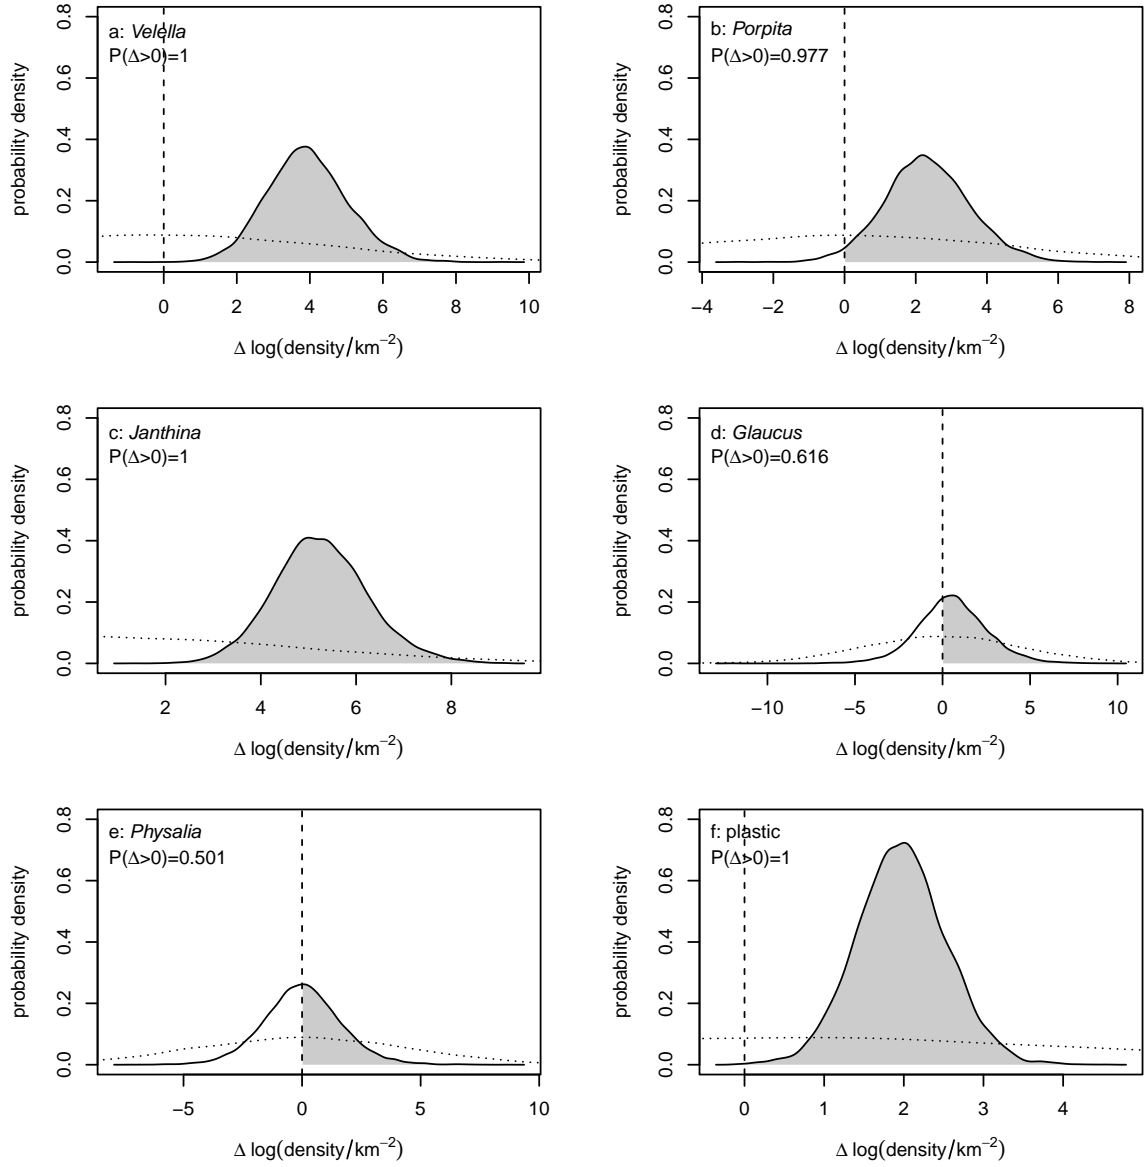

Figure H: Difference  $\Delta$  in expected natural log of density (in numbers  $\text{km}^{-2}$ ) between the inside-patch ( $\Omega_{\text{in}}$ ) and outside-patch ( $\Omega_{\text{out}}$ ) regions for (a) *Veilella*, (b) *Porpita*, (c) *Janthina*, (d) *Glaucus*, (e) *Physalia* and (f) plastic. Kernel density estimates of posterior distributions, with posterior probability that the difference is positive given on each panel. Dotted lines are kernel density estimates of the prior distribution for each difference. The data underlying this Figure can be found in S1 Data.

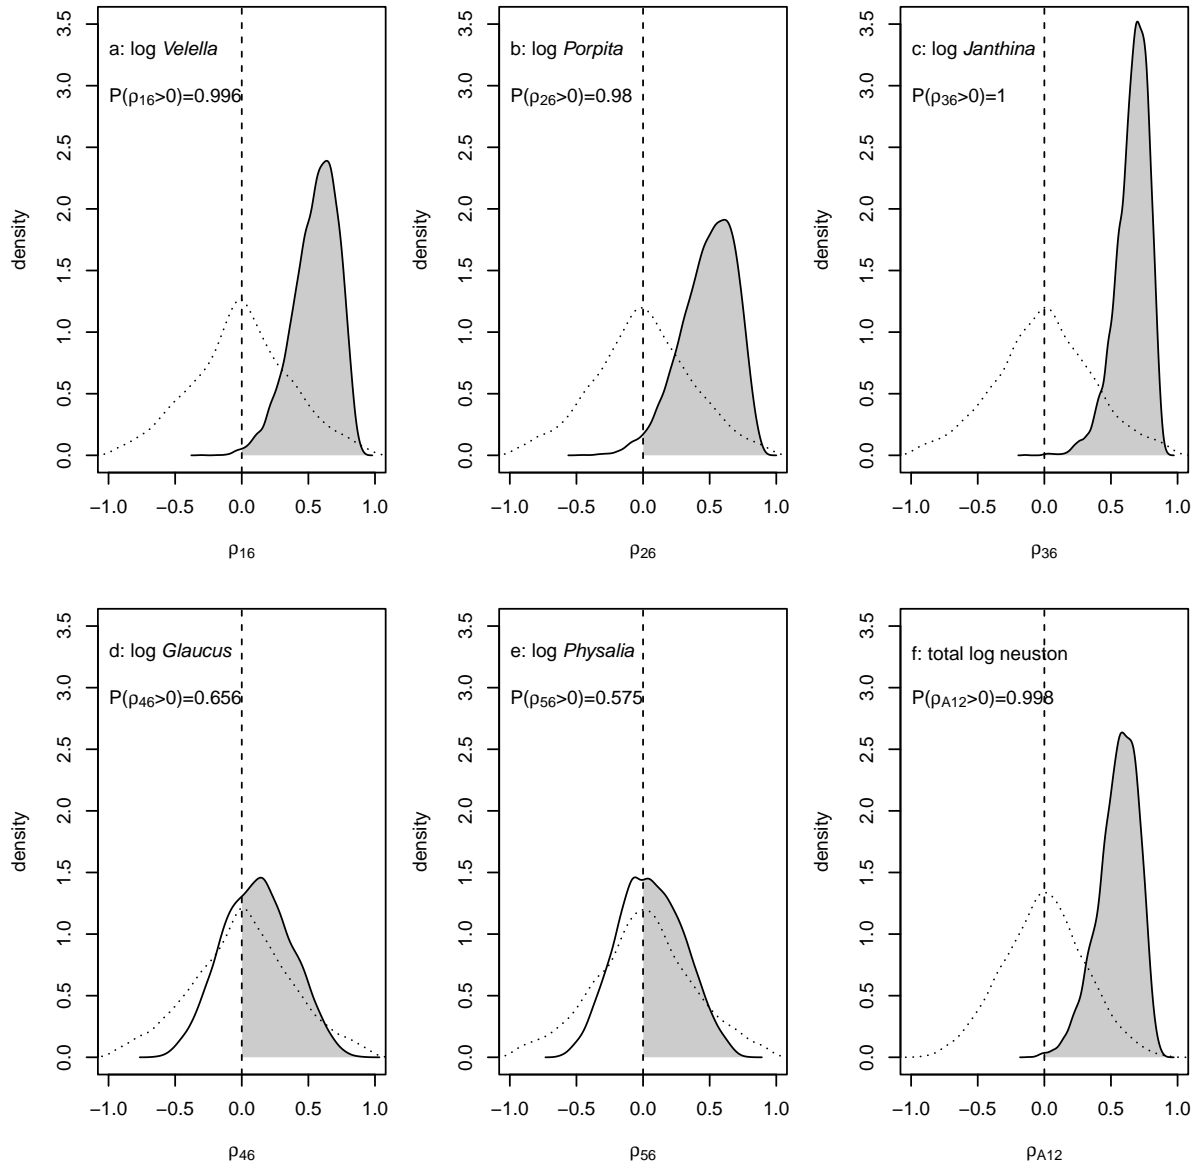

Figure I: Posterior densities of marginal correlations  $\rho$  over the entire region  $\Omega_{\text{all}}$  between log plastic density and log densities of a: *Verella*, b: *Porpita*, c: *Janthina*, d: *Glaucus*, e: *Physalia* and f: total log neuston. Kernel density estimates, with vertical dashed lines at zero. Posterior probability that each marginal correlation is positive is indicated. Dotted lines are kernel density estimates of the prior distribution for each correlation. The data underlying this Figure can be found in S1 Data.

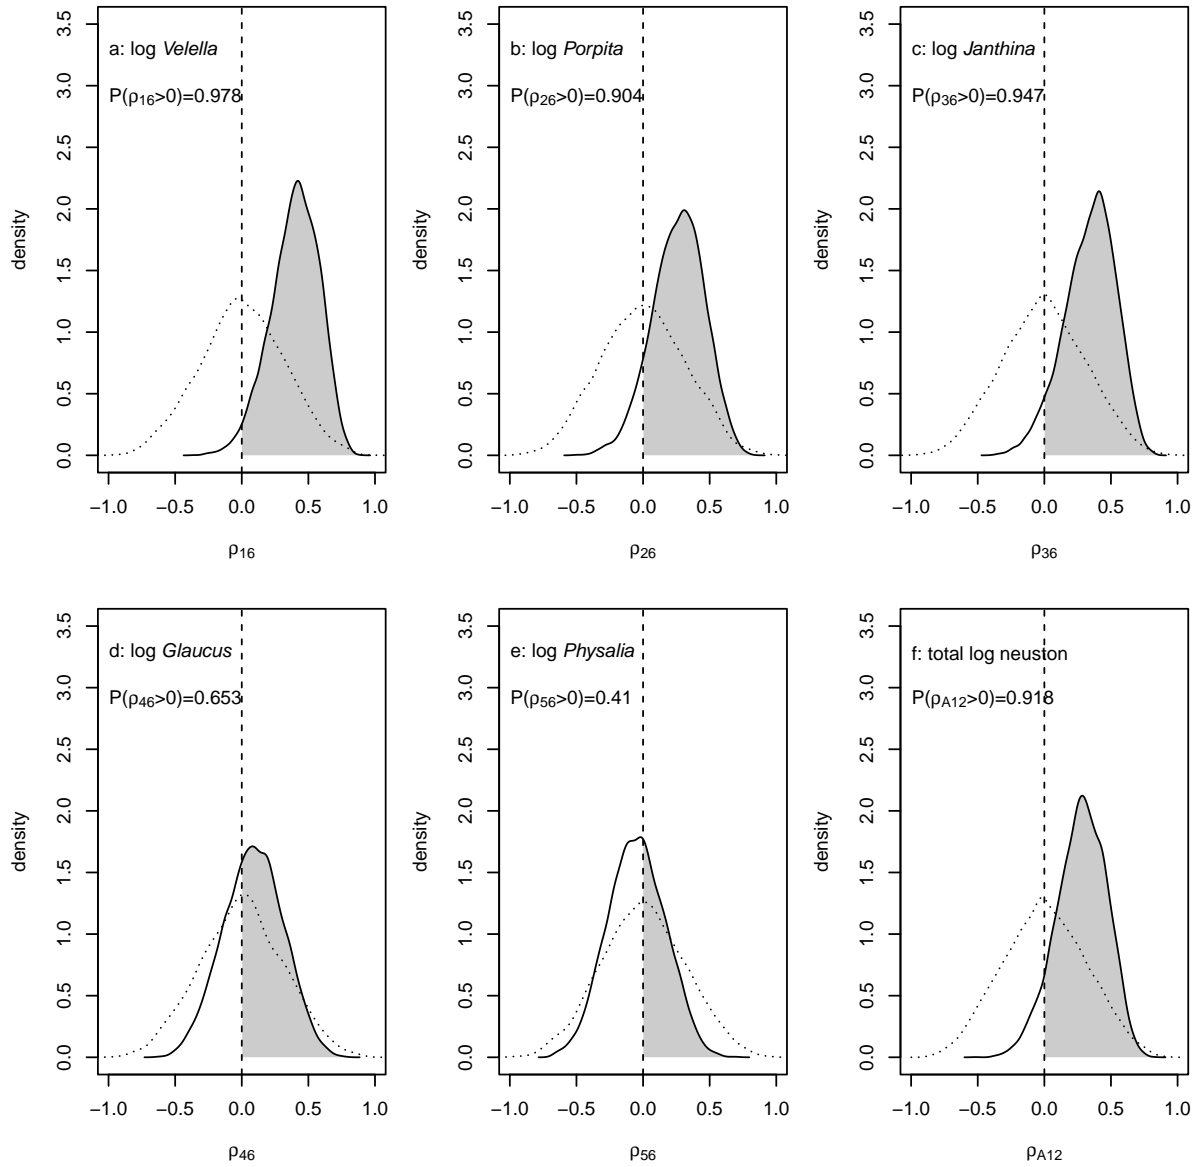

Figure J: Posterior densities of marginal correlations  $\rho$  over the inside-patch region  $\Omega_{\text{in}}$  between log plastic density and log densities of a: *Veleva*, b: *Porpita*, c: *Janthina*, d: *Glaucus*, e: *Physalia* and f: total log neuston. Kernel density estimates, with vertical dashed lines at zero. Posterior probability that each marginal correlation is positive is indicated. Dotted lines are kernel density estimates of the prior distribution for each correlation. The data underlying this Figure can be found in S1 Data.

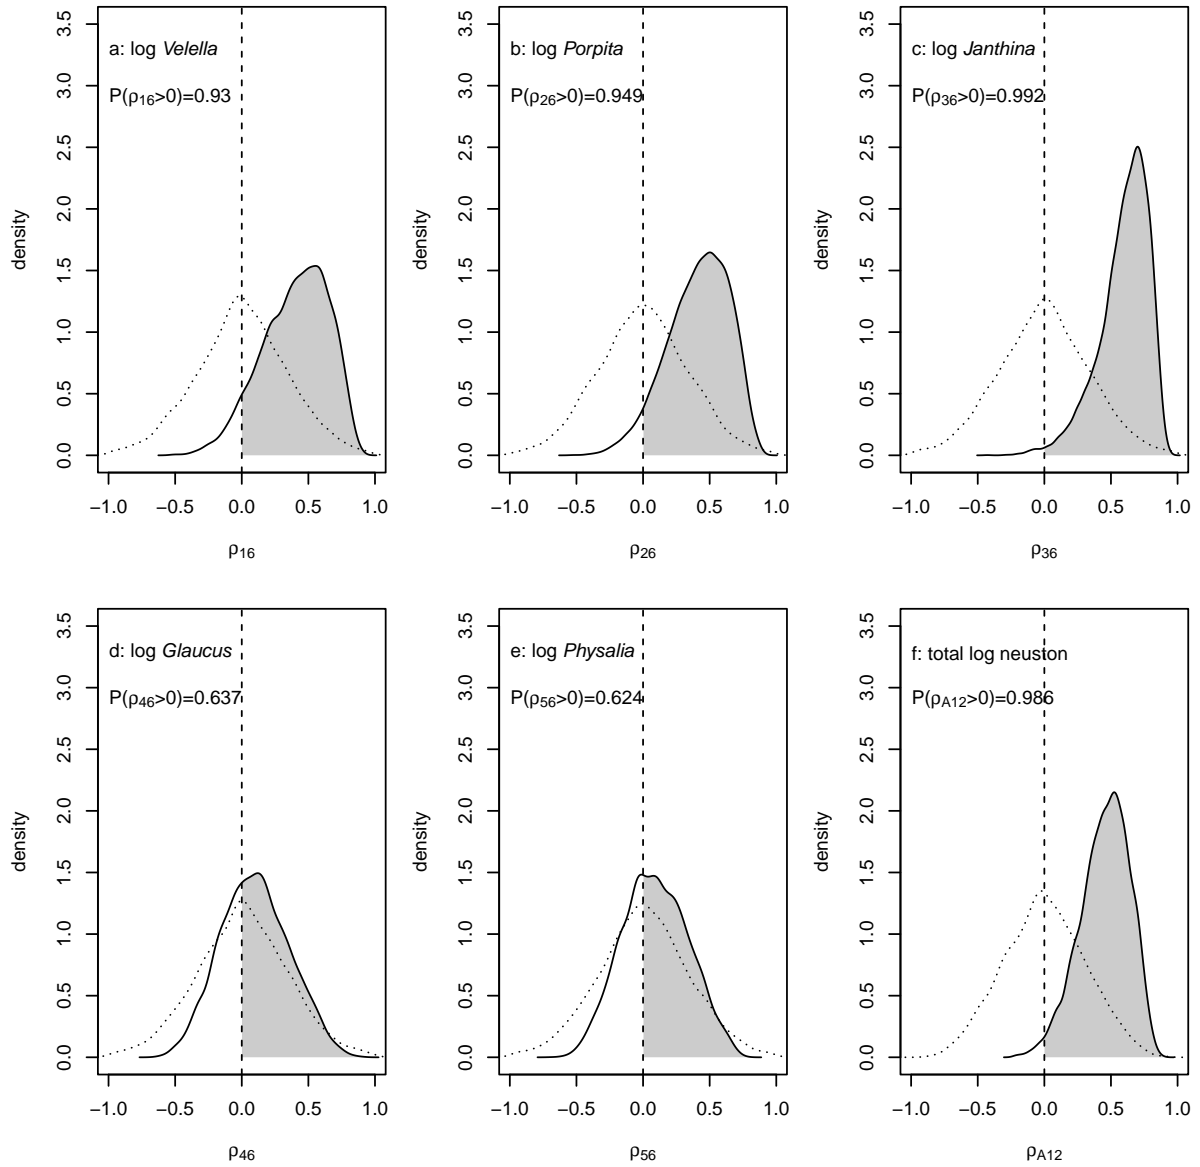

Figure K: Posterior densities of marginal correlations  $\rho$  over the outside-patch region  $\Omega_{\text{out}}$  between log plastic density and log densities of a: *Verella*, b: *Porpita*, c: *Janthina*, d: *Glaucus*, e: *Physalia* and f: total log neuston. Kernel density estimates, with vertical dashed lines at zero. Posterior probability that each marginal correlation is positive is indicated. Dotted lines are kernel density estimates of the prior distribution for each correlation. The data underlying this Figure can be found in S1 Data.



361 There appeared to be little information in these data on absolute densities. There were negative  
 362 posterior relationships between the intercepts  $\beta_{0,j}$  and log detectability  $\kappa_j$  for each category  $j$ , particularly  
 363 for the most abundant categories *Veleva*, *Janthina* and plastic (Figure L). Thus it may be hard to  
 364 distinguish between high absolute density with low detectability, and low absolute density with high  
 365 detectability. However, this did not appear to be a structural identifiability problem. For all sites and  
 366 categories, the Hessian was of full rank, suggesting that the parameters may be identifiable [4]. Note  
 367 that the main results of interest, including relationships with log tracer density, differences in log density  
 368 between inside and outside the patch, and marginal correlations between log densities of neuston and  
 369 plastic, do not require knowledge of absolute densities.

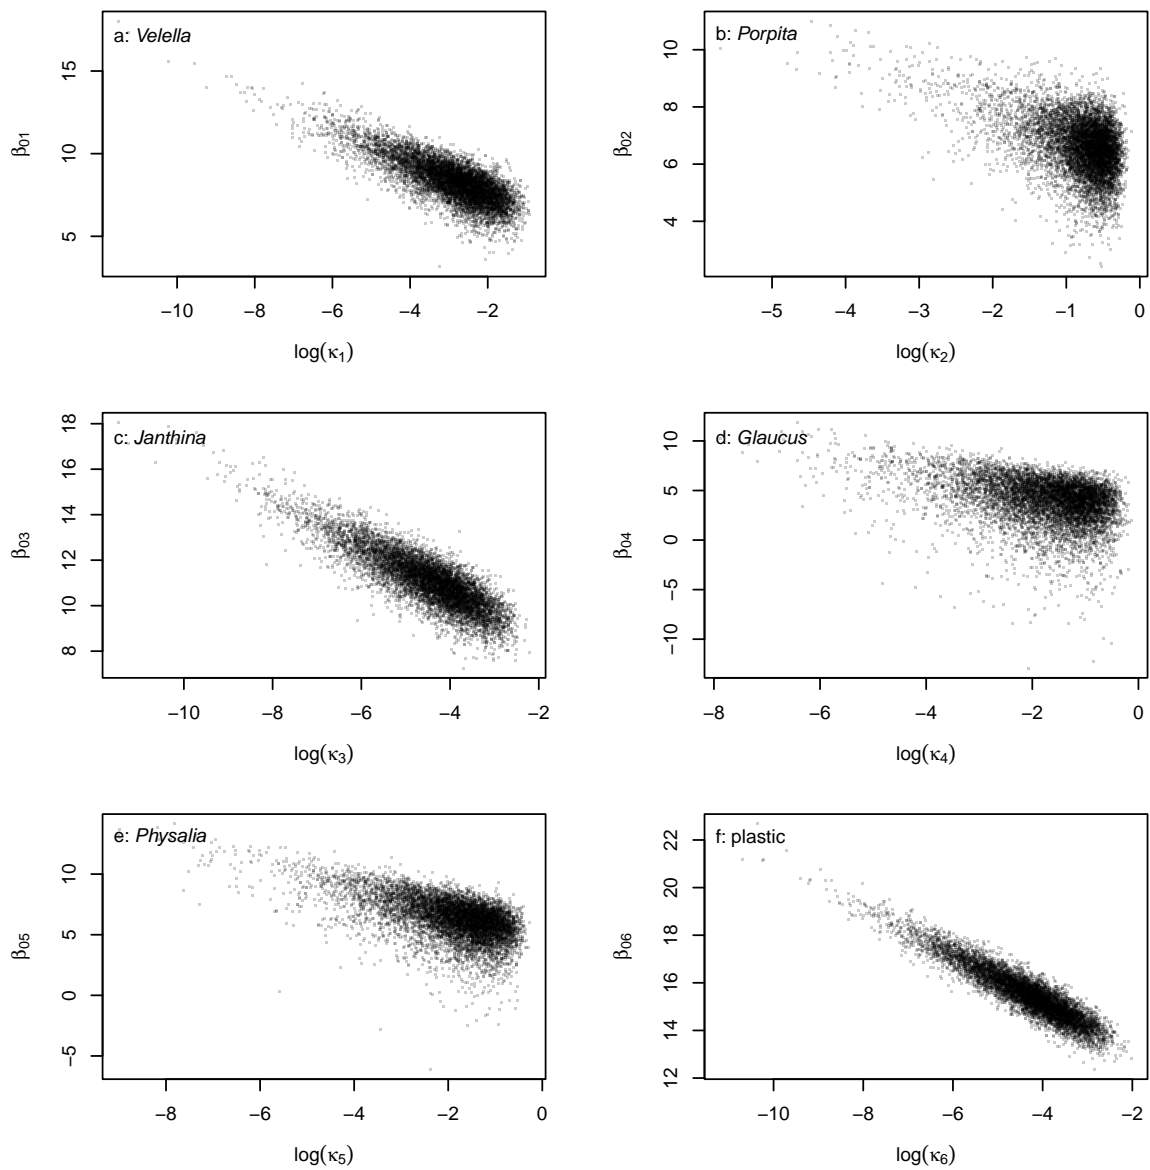

Figure L: Posterior relationships between intercept  $\beta_{0,i}$  and log detectability  $\kappa_i$  for a: *Veleva*, b: *Porpita*, c: *Janthina*, d: *Glaucus*, e: *Physalia* and f: plastic. The data underlying this Figure can be found in S1 Data.

370 Fitting to simulated data sets did not suggest any major errors in coding (Figures M, N). In most  
371 cases, posterior densities (grey lines) were concentrated around the true values (pink lines), were more  
372 concentrated than the priors (dashed lines), and the 95% highest posterior density regions contained  
373 the true values between 8 and 10 times out of 10. However, for the intercept  $\beta_0$ , there was evidence  
374 of bias, with 95% highest posterior density regions containing the true values as little as 5 times out of  
375 10 (Figure Mc and f). In addition, posterior densities of detectabilities  $\kappa$  were not concentrated around  
376 the true values for many simulated data sets (Figure My to ad). As noted above, this is likely to be  
377 a consequence of the strong negative posterior relationships between elements of  $\beta_0$  and  $\log \kappa$ , and will  
378 not affect the main results of interest. Also, prior and posterior densities were almost identical for the  
379 interaction parameter  $\beta_3$  (Figure Ms to x), suggesting that there is likely to be very little information  
380 on differences in the slope of the relationship between log densities and log tracer inside and outside the  
381 patch.

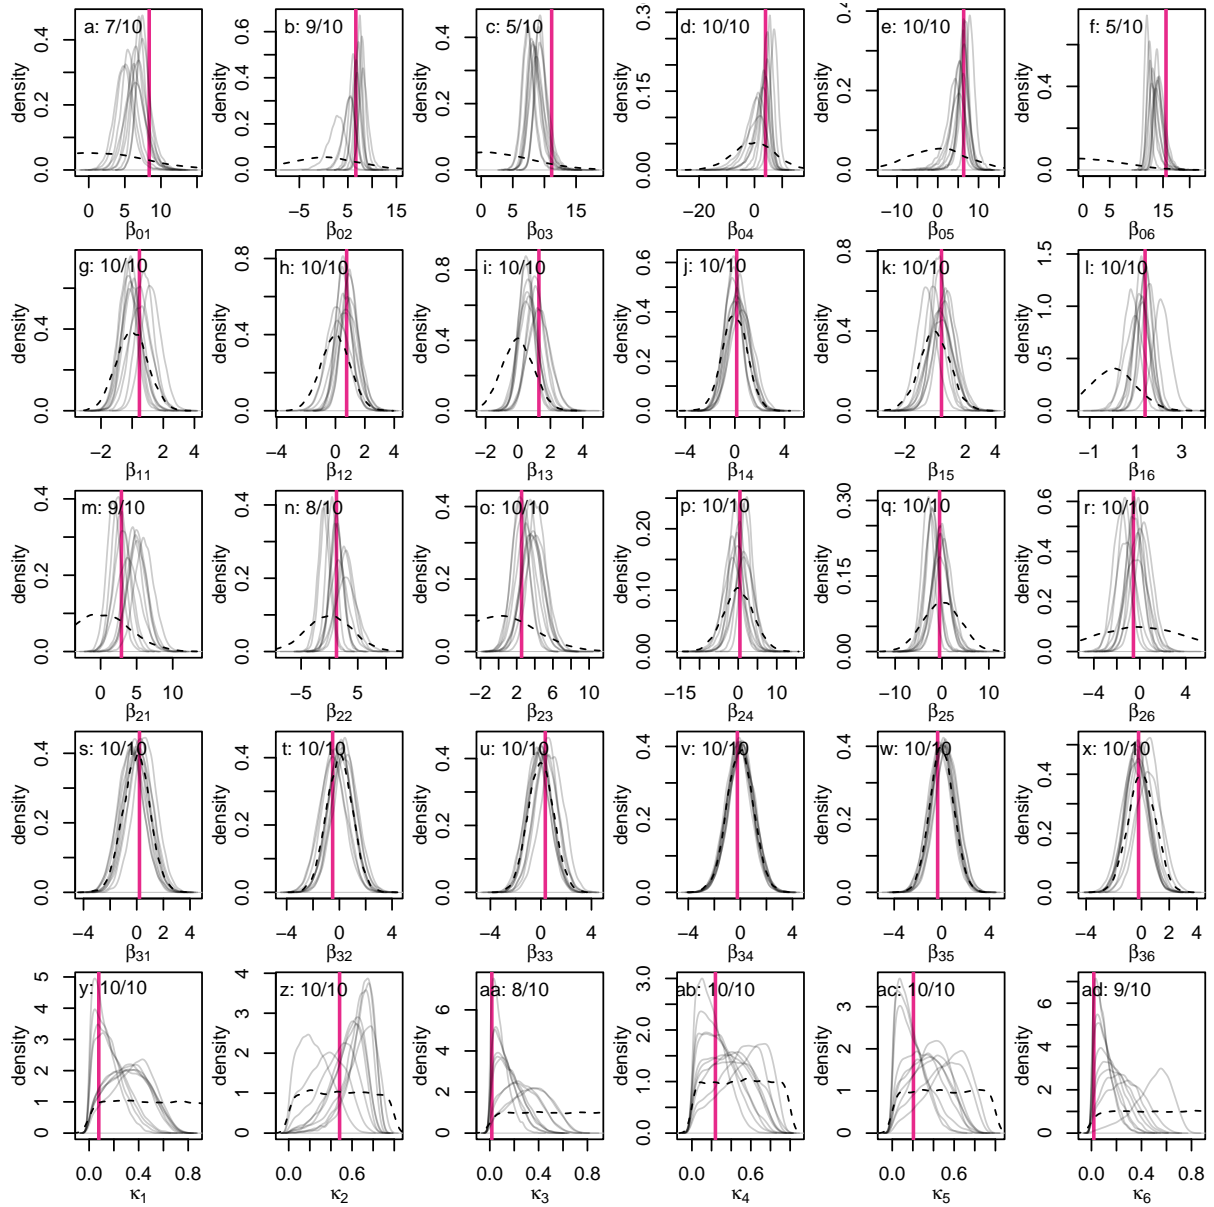

Figure M: Posterior densities for elements of the parameters  $\beta_0$ ,  $\beta_1$ ,  $\beta_2$ ,  $\beta_3$  and  $\kappa$  (grey lines, kernel density estimates) from 10 simulated data sets for which the posterior means estimated from the real data set (vertical pink lines). Dashed lines are kernel density estimates of the priors from a sample of the same size as from the posteriors. The proportion of simulated data sets for which the 95% highest posterior density region contained the true parameter value is indicated on each panel. The data underlying this Figure can be found in S1 Data.

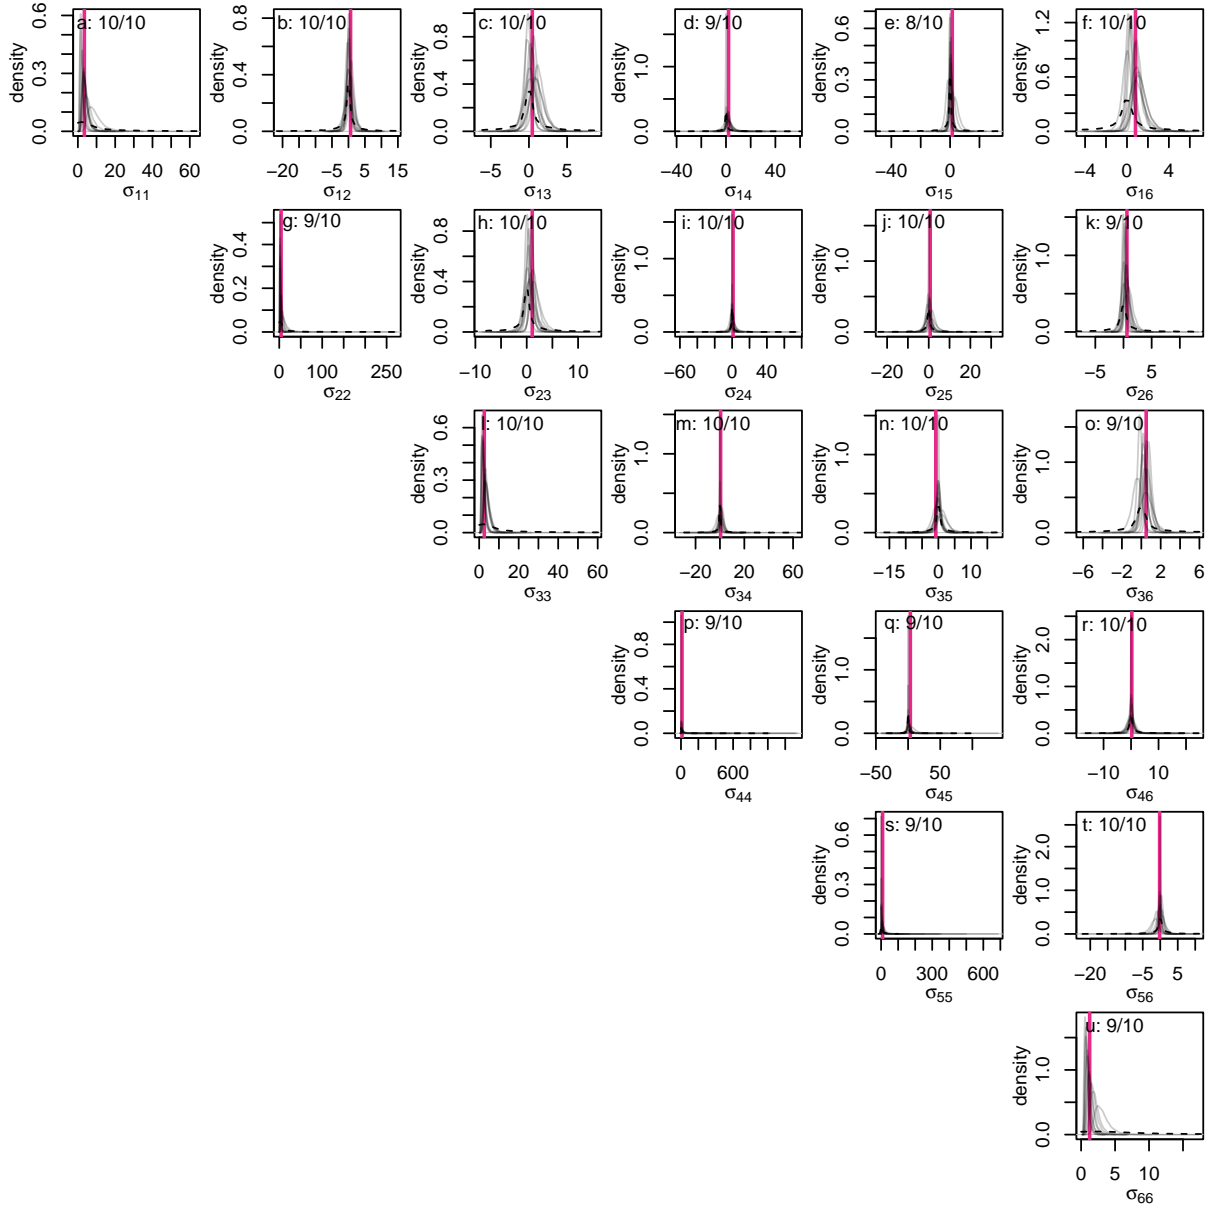

Figure N: Posterior densities for elements of the upper triangle of the covariance matrix  $\Sigma$  of observation-level random effects (grey lines, kernel density estimates) from 10 simulated data sets for which the true values were the posterior means estimated from the real data set (vertical pink lines). Dashed lines are kernel density estimates of the priors from a sample of the same size as from the posteriors. The proportion of simulated data sets for which the 95% highest posterior density region contained the true parameter value is indicated on each panel. The data underlying this Figure can be found in S1 Data.

382 Graphical posterior predictive checks did not suggest any major problems with the model. For  
383 each category of object, simulated relationships between log density and log tracer (Figure O, open  
384 circles, with zero mean counts represented by vertical lines just above the  $x$  axis) did not appear to differ  
385 systematically from the observed relationships (Figure O, filled circles, with zero mean counts represented  
386 by vertical lines on the  $x$ -axis). Note that where the observed mean count was zero (represented by a  
387 vertical line just above the  $x$ -axis), small simulated non-zero counts are plausible but correspond to  
388 much higher densities, and will be represented by points far above the  $x$ -axis. Similarly, where the  
389 observed mean count was non-zero but small, zero simulated mean counts are plausible, and will be  
390 represented by vertical lines just above the  $x$ -axis. Thus, the empty horizontal band in the middle  
391 of each panel on Figure O is entirely expected. For each category of object, the posterior predictive  
392 distribution of correlations between the two counts over observations was strongly skewed towards values  
393 close to 1 (Figure P, histograms), and for all categories other than *Glaucus* and *Physalia*, the observed  
394 correlation (Figure P, vertical dashed lines) was very close to 1. For the rare taxa *Glaucus* and *Physalia*  
395 (Figure Pd and e), the observed correlation was positive but much weaker than for other taxa, and the  
396 posterior predictive distribution of correlations was less strongly skewed towards 1 than for other taxa,  
397 and tended to be higher than the observed correlation. This suggests the possibility of additional sources  
398 of observation error not captured by our model. Nevertheless, our model appears to capture the main  
399 features of the observations.

400 Leave-one-out cross-validation estimates of log predictive density suggested that the observation  
401 SJR\_019 was very unlikely under a model fitted to the other observations (Figure Q). This was an  
402 in-patch observation with high counts of *Verella*, *Porpita*, *Janthina* and plastic. To check that this  
403 observation was not having a substantial effect, we recalculated the main results with this observation  
404 omitted. We confirmed that the posterior estimates of the relationship between log density and log  
405 tracer concentration (Figure R), the differences in expected natural log density between inside-patch  
406 and outside-patch regions (Figure S), and the marginal correlations between log plastic density and log  
407 density of each taxon (Figure T), were not substantially different without SJR\_019.

408 We also noted that one observation coded *a priori* as outside the patch on geographical grounds in  
409 fact had a higher tracer concentration than the minimum for observations coded *a priori* as inside the  
410 patch (Figure D, orange point in top right of region bounded by solid line). We re-ran the model with  
411 this observation recoded as inside the patch. The main results were not substantially different (Figures  
412 U, V, W).

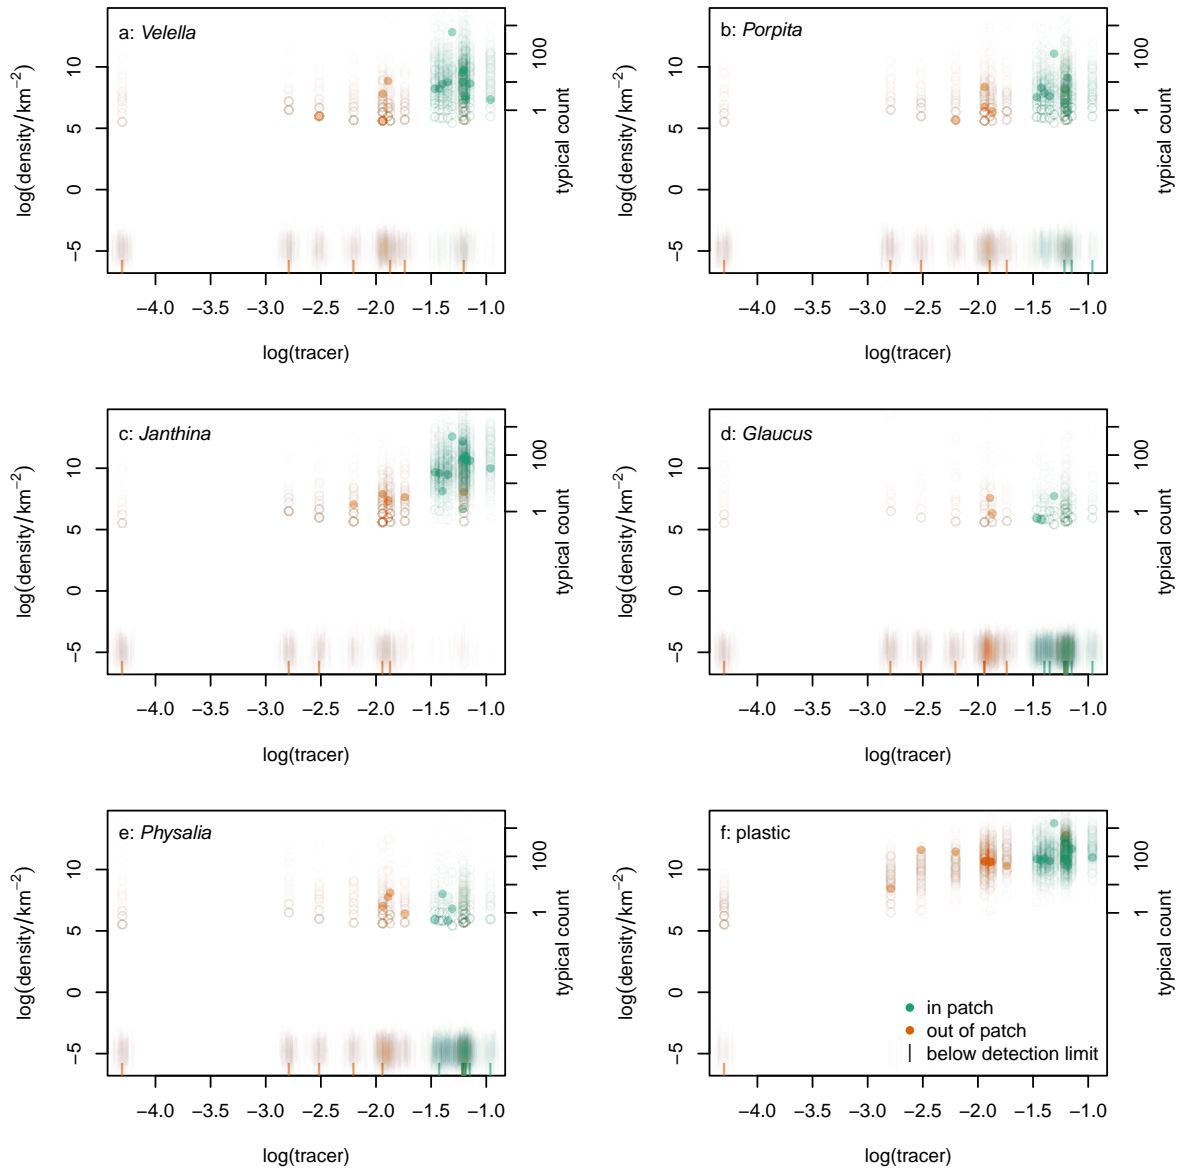

Figure O: Posterior predictive relationship between natural log of density (in numbers  $\text{km}^{-2}$ ) and natural log of dimensionless tracer concentration for (a) *Velella*, (b) *Porpita*, (c) *Janthina*, (d) *Glaucus*, (e) *Physalia* and (f) plastic outside (orange) and in (green) the patch. Filled points are observed sample means from two independent counts, with zeros plotted as vertical lines on the  $x$ -axis. Open points are sample means from two independent simulated counts, for each of 200 simulated data sets, with zeros plotted as vertical lines just above the  $x$ -axis (with jittered  $x$ -coordinates). The right-hand  $y$ -axis has tick marks at the log densities corresponding to counts of 1, 10, 100 and 1000 objects in the mean trawled area. The data underlying this Figure can be found in S1 Data.

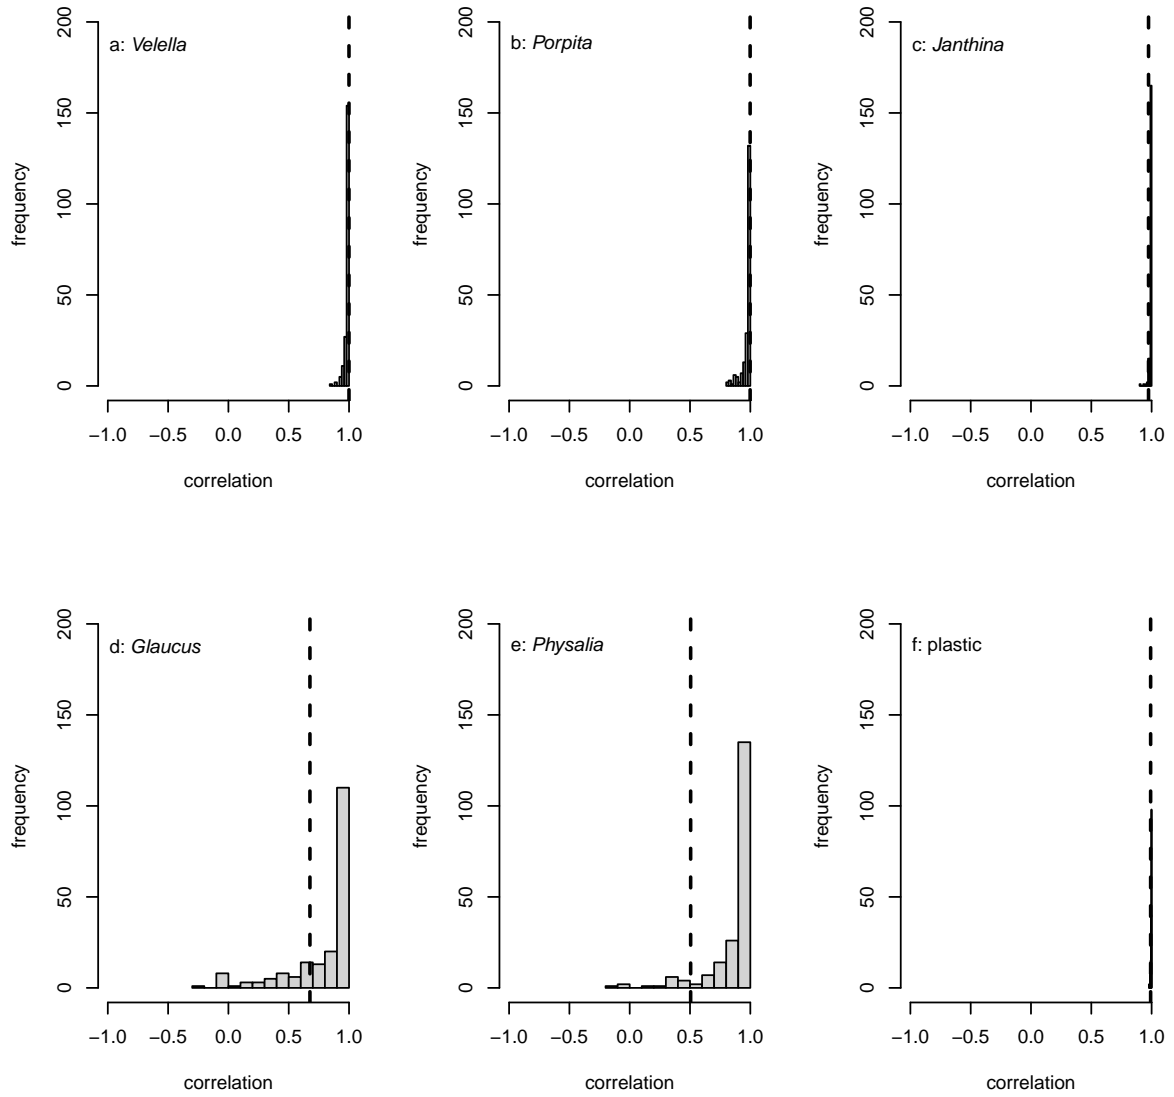

Figure P: Posterior predictive distributions of the correlation between the two counts for (a) *Verella*, (b) *Porpita*, (c) *Janthina*, (d) *Glaucus*, (e) *Physalia* and (f) plastic, from 200 simulated data sets. Vertical dashed lines: observed correlations. The data underlying this Figure can be found in S1 Data.

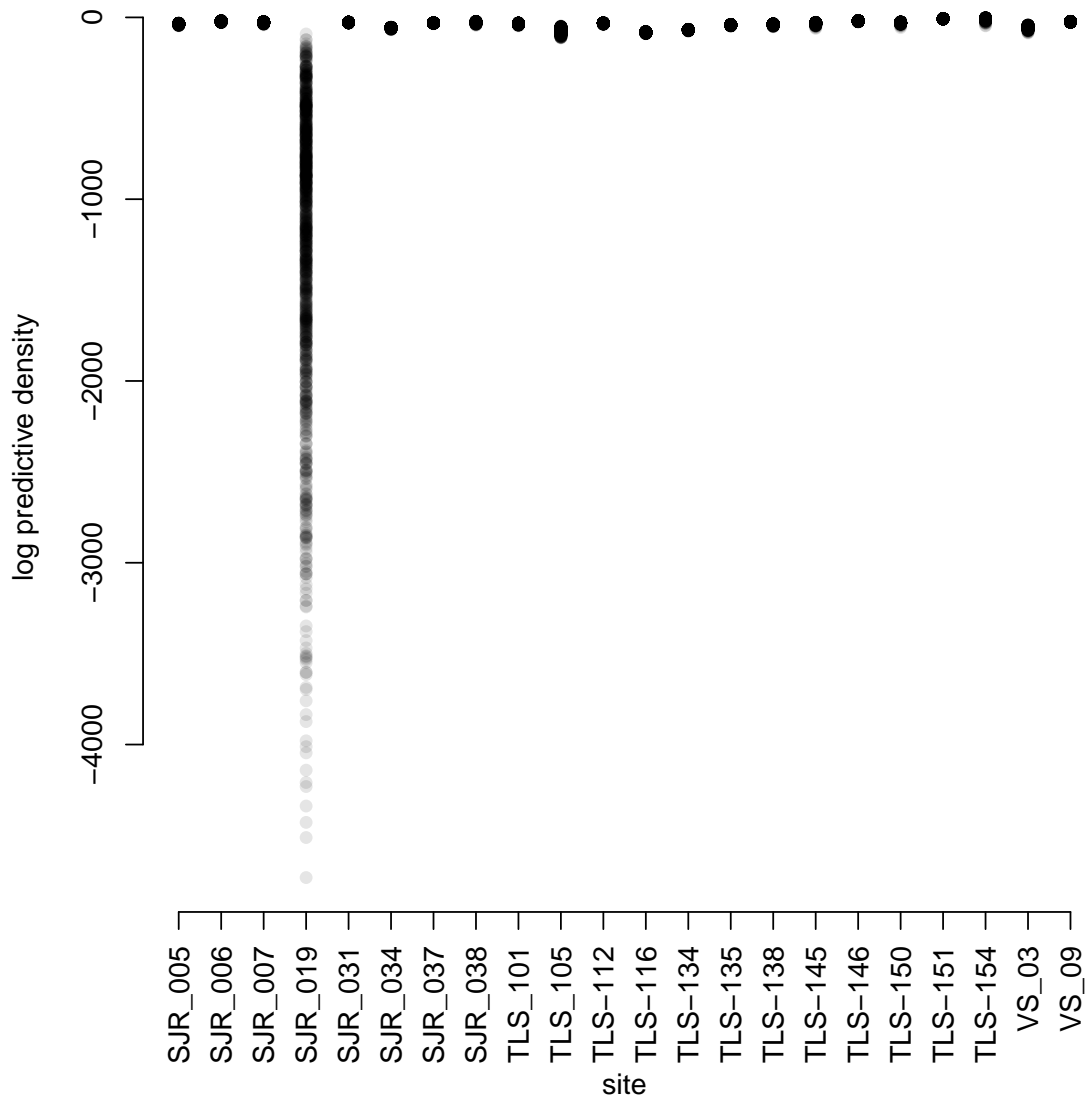

Figure Q: Leave-one-out cross-validation estimates of log predictive density for each site. Points are log predictive densities for 1000 sets of parameters drawn from the posterior density estimated without the focal site. For each point, the log predictive density is integrated over the distribution of the observation-level random effect  $\varepsilon$ , by classical Monte Carlo integration with a sample of size  $1 \times 10^5$ . The data underlying this Figure can be found in S1 Data.



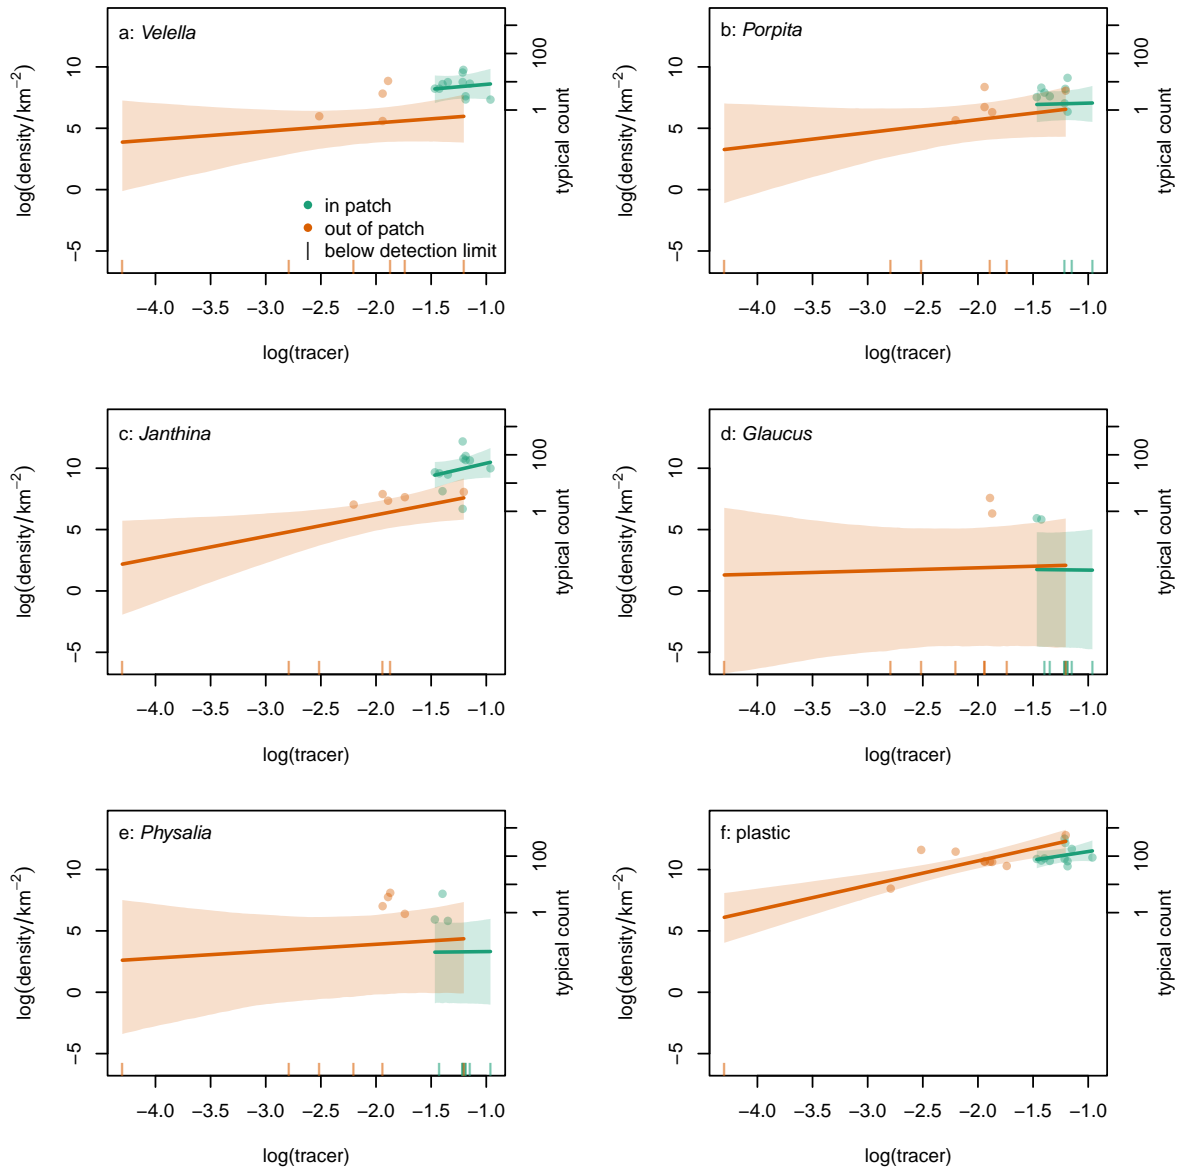

Figure R: Relationship between natural log of density (in numbers  $\text{km}^{-2}$ ) and natural log of dimensionless tracer concentration, with the unusual observation SJR\_019 omitted, for (a) *Velevella*, (b) *Porpita*, (c) *Janthina*, (d) *Glaucus*, (e) *Physalia* and (f) plastic outside (orange) and in (green) the patch. Points are sample means from two independent counts, with zeros plotted as vertical lines on the  $x$ -axis (note that models were fitted to the two counts, not the mean densities). Lines are posterior means, with 95% equal-tailed credible bands, and include the detectability parameters  $\kappa_i$ . The right-hand  $y$ -axis has tick marks at the log densities corresponding to counts of 1, 10, 100 and 1000 objects in the mean trawled area. The data underlying this Figure can be found in S1 Data.

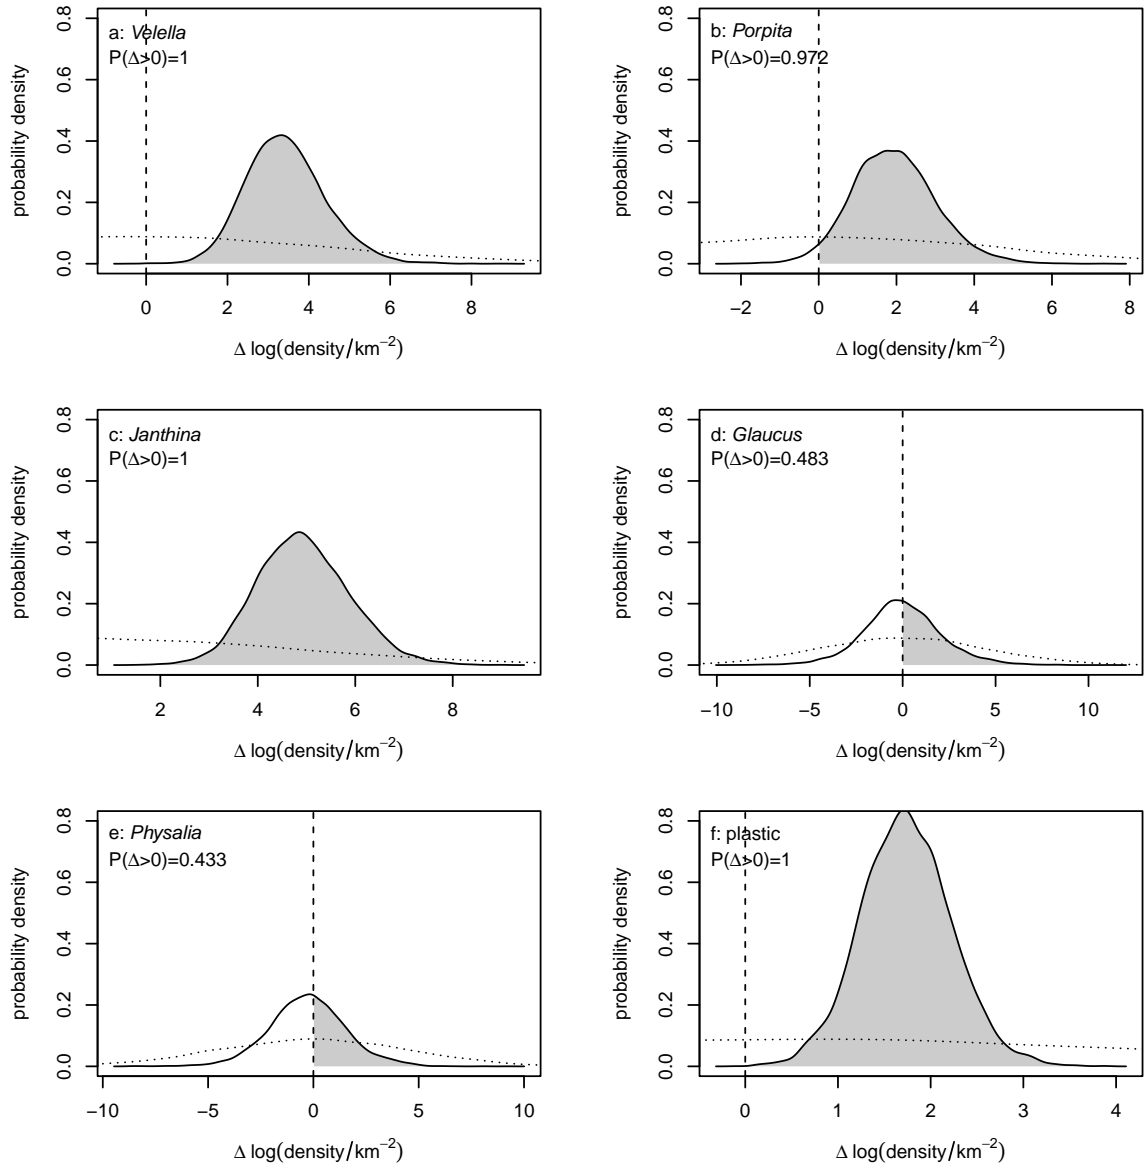

Figure S: Difference  $\Delta$  in expected natural log of density (in numbers  $\text{km}^{-2}$ ) between the inside-patch ( $\Omega_{\text{in}}$ ) and outside-patch ( $\Omega_{\text{out}}$ ) regions, with the unusual observation SJR\_019 omitted, for (a) *Verella*, (b) *Porpita*, (c) *Janthina*, (d) *Glaucus*, (e) *Physalia* and (f) plastic. Kernel density estimates of posterior distributions, with posterior probability that the difference is positive given on each panel. Dotted lines are kernel density estimates of the prior distribution for each difference. The data underlying this Figure can be found in S1 Data.

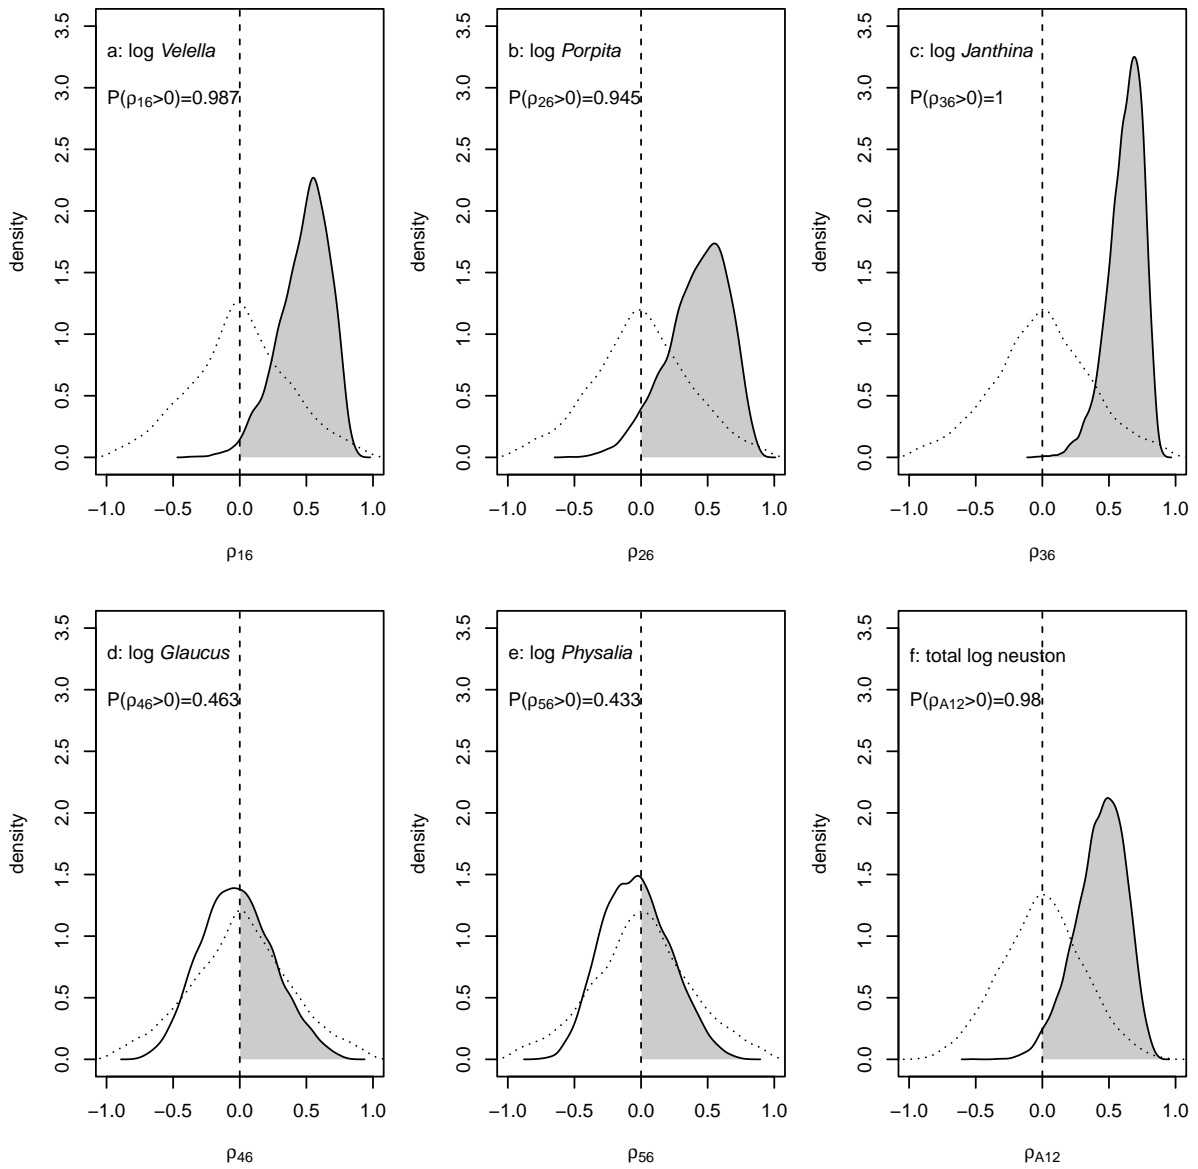

Figure T: Posterior densities of marginal correlations  $\rho$  over the entire region  $\Omega_{\text{all}}$  between log plastic density and log densities, with the unusual observation SJR\_019 omitted, of a: *Verella*, b: *Porpita*, c: *Janthina*, d: *Glaucus*, e: *Physalia* and f: total log neuston. Kernel density estimates, with vertical dashed lines at zero. Posterior probability that each marginal correlation is positive is indicated. Dotted lines are kernel density estimates of the prior distribution for each correlation. The data underlying this Figure can be found in S1 Data.

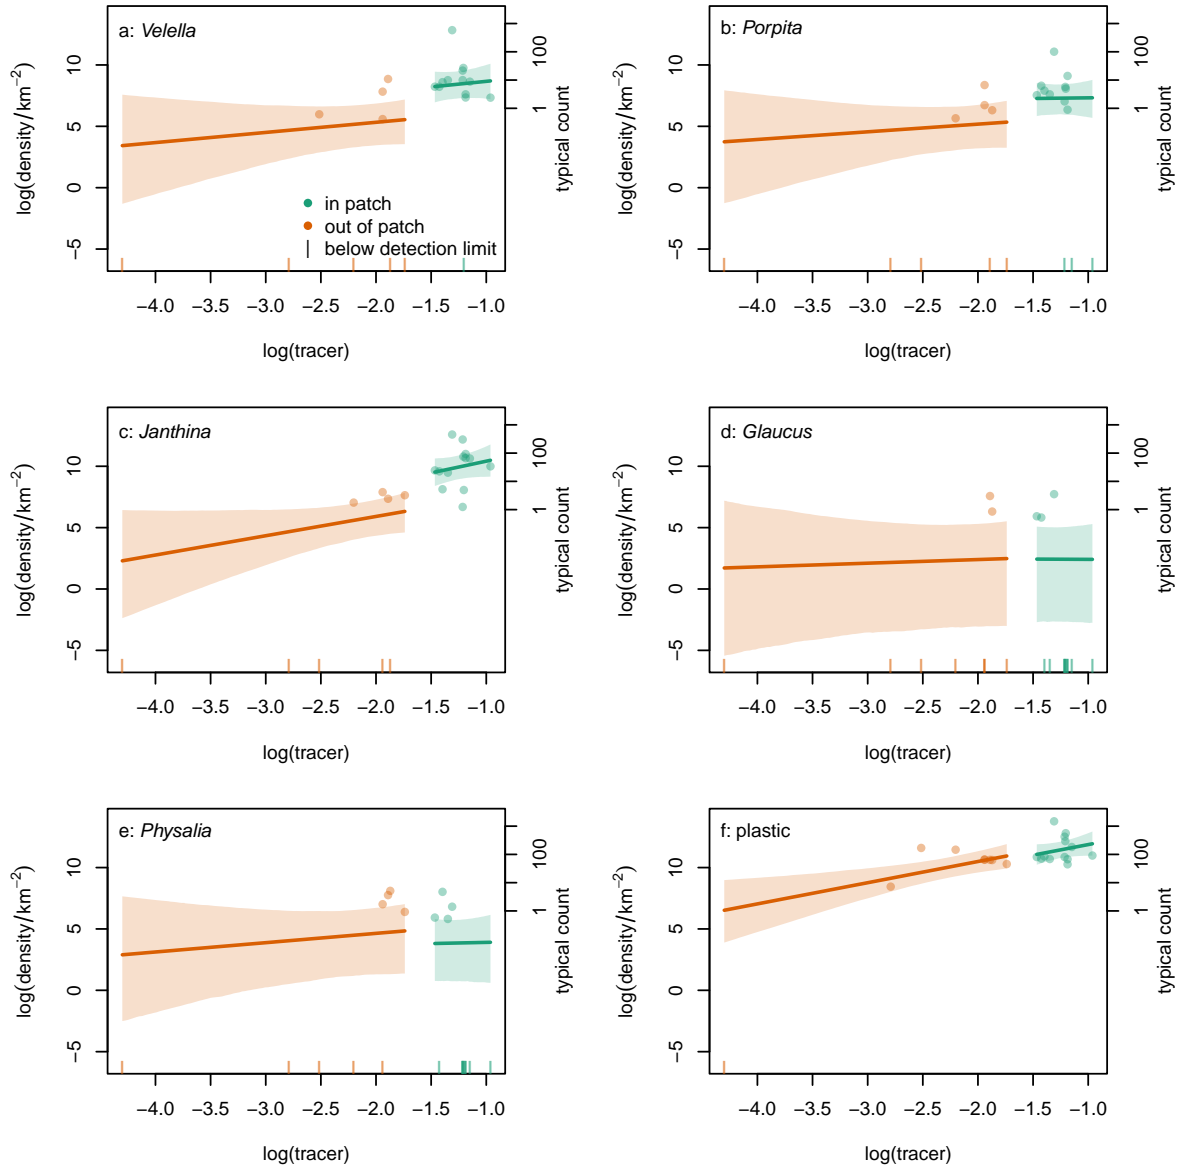

Figure U: Relationship between natural log of density (in numbers  $\text{km}^{-2}$ ) and natural log of dimensionless tracer concentration, with the outside observation having higher tracer concentration than the minimum for inside observations recoded as inside, for (a) *Velevella*, (b) *Porpita*, (c) *Janthina*, (d) *Glaucus*, (e) *Physalia* and (f) plastic outside (orange) and in (green) the patch. Points are sample means from two independent counts, with zeros plotted as vertical lines on the  $x$ -axis (note that models were fitted to the two counts, not the mean densities). Lines are posterior means, with 95% equal-tailed credible bands, and include the detectability parameters  $\kappa_i$ . The right-hand  $y$ -axis has tick marks at the log densities corresponding to counts of 1, 10, 100 and 1000 objects in the mean trawled area. The data underlying this Figure can be found in S1 Data.

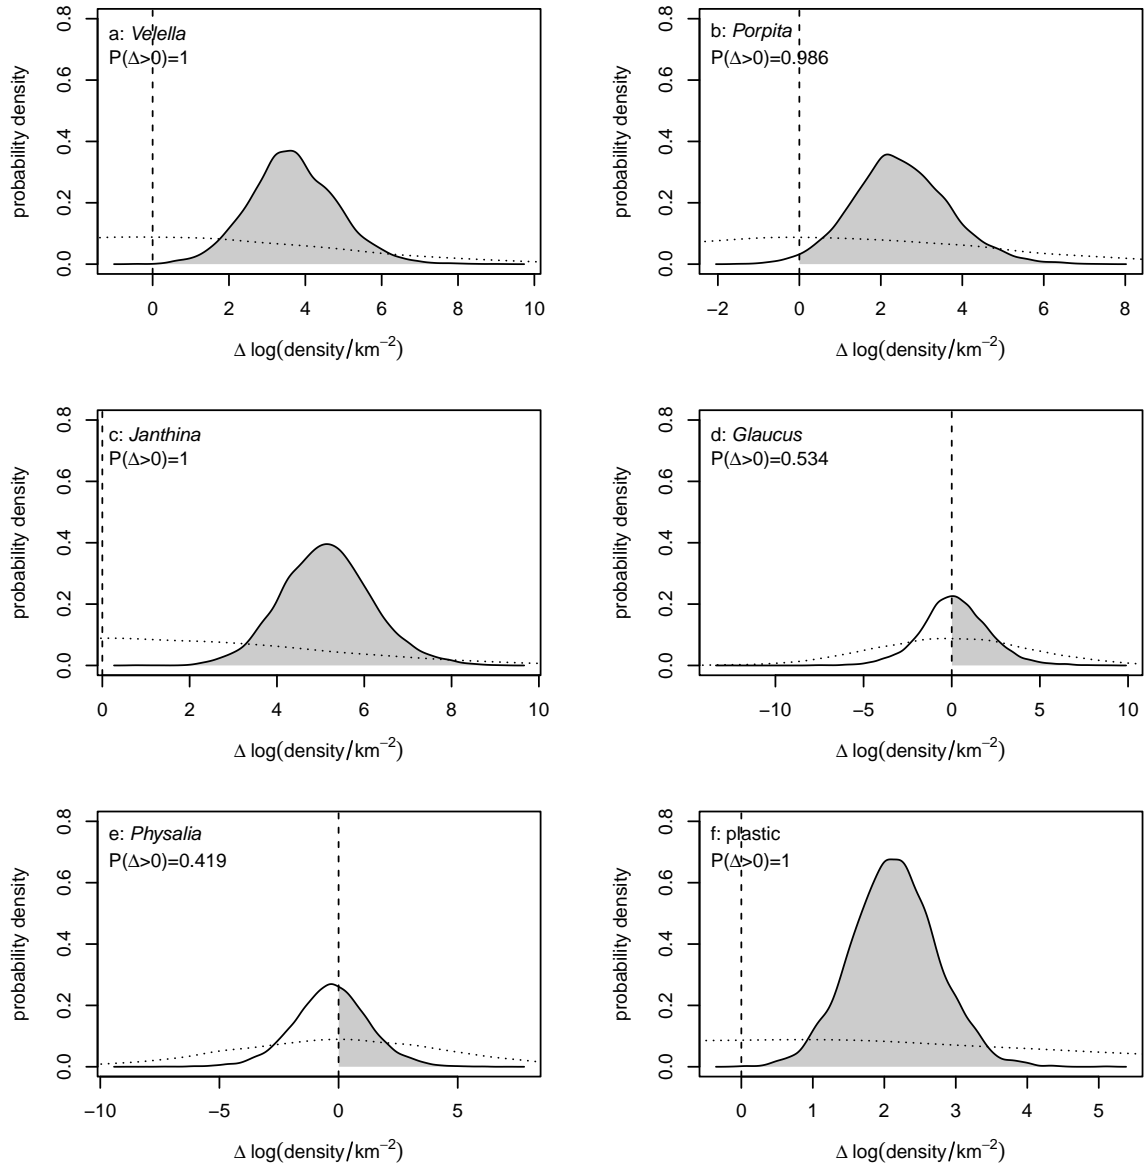

Figure V: Difference  $\Delta$  in expected natural log of density (in numbers  $\text{km}^{-2}$ ) between the inside-patch ( $\Omega_{\text{in}}$ ) and outside-patch ( $\Omega_{\text{out}}$ ) regions, with the outside observation having higher tracer concentration than the minimum for inside observations recoded as inside, for (a) *Vejella*, (b) *Porpita*, (c) *Janthina*, (d) *Glaucus*, (e) *Physalia* and (f) plastic. Kernel density estimates of posterior distributions, with posterior probability that the difference is positive given on each panel. Dotted lines are kernel density estimates of the prior distribution for each difference. The data underlying this Figure can be found in S1 Data.

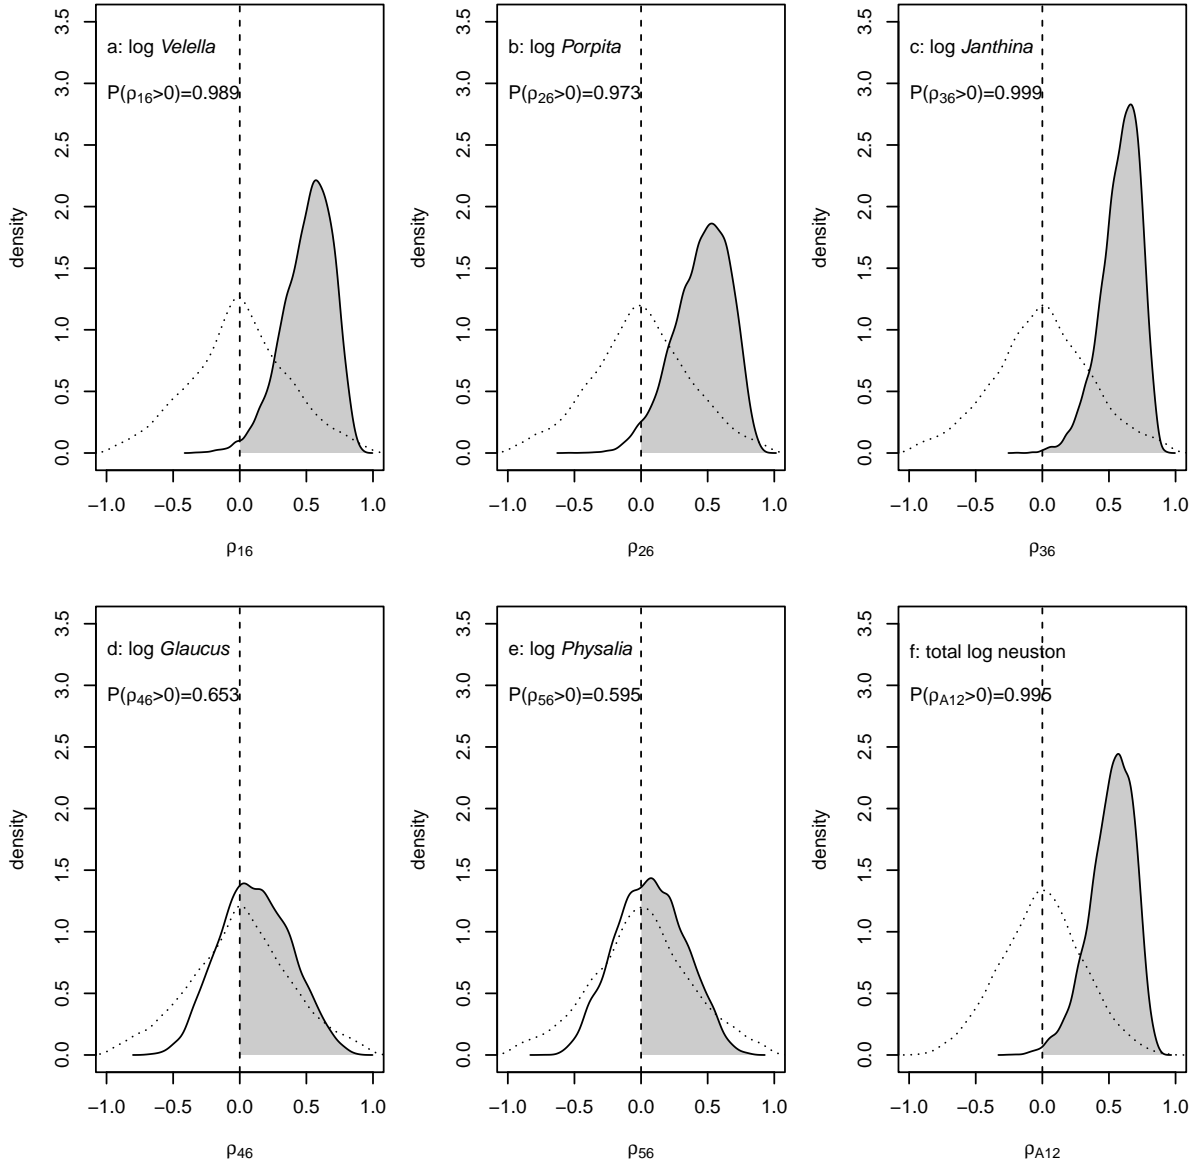

Figure W: Posterior densities of marginal correlations  $\rho$  over the entire region  $\Omega_{\text{all}}$  between log plastic density and log densities, with the outside observation having higher tracer concentration than the minimum for inside observations recoded as inside, of a: *Velella*, b: *Porpita*, c: *Janthina*, d: *Glaucus*, e: *Physalia* and f: total log neuston. Kernel density estimates, with vertical dashed lines at zero. Posterior probability that each marginal correlation is positive is indicated. Dotted lines are kernel density estimates of the prior distribution for each correlation. The data underlying this Figure can be found in S1 Data.

Table A: Parameter estimates for the model defined by Equation D: intercept  $\beta_0$ , tracer effect  $\beta_1$ , patch effect  $\beta_2$ , interaction effect  $\beta_3$ , detectability  $\kappa$ , rows of lower triangle of covariance matrix  $\Sigma$  of observation-level random effects. Columns are taxa and plastic. Each cell contains the posterior mean, with marginal 95% credible highest density regions in parentheses. For plastic detectability  $\kappa_6$ , the highest density region consists of multiple disjoint intervals. Negative lower bounds for highest density regions for elements of  $\kappa$  are smoothing artefacts.

|            | <i>Veleva</i>      | <i>Porpita</i>      | <i>Jamthina</i>     | <i>Glauucus</i>      | <i>Physalia</i>     | plastic                            |
|------------|--------------------|---------------------|---------------------|----------------------|---------------------|------------------------------------|
| $\beta_0$  | 8.38 (5.69, 10.97) | 6.64 (4.61, 8.66)   | 11.14 (8.68, 13.59) | 3.97 (-0.58, 8.41)   | 6.35 (2.89, 9.82)   | 15.56 (13.42, 17.69)               |
| $\beta_1$  | 0.47 (-0.88, 1.79) | 0.76 (-0.58, 2.10)  | 1.29 (0.05, 2.53)   | 0.15 (-1.46, 1.77)   | 0.42 (-1.11, 1.97)  | 1.40 (0.67, 2.13)                  |
| $\beta_2$  | 2.89 (0.52, 5.23)  | 1.24 (-1.20, 3.68)  | 2.54 (0.53, 4.58)   | 0.45 (-3.26, 4.18)   | -0.52 (-3.80, 2.73) | -0.56 (-2.06, 0.94)                |
| $\beta_3$  | 0.20 (-1.66, 2.07) | -0.51 (-2.37, 1.35) | 0.35 (-1.49, 2.17)  | -0.23 (-2.13, 1.69)  | -0.36 (-2.28, 1.56) | -0.21 (-1.92, 1.49)                |
| $\kappa$   | 0.08 (-0.00, 0.21) | 0.48 (0.16, 0.79)   | 0.02 (-0.00, 0.05)  | 0.24 (-0.03, 0.55)   | 0.21 (-0.01, 0.48)  | 0.02 (-0.00, 0.05)<br>(0.05, 0.05) |
| $\sigma_1$ | 3.47 (0.95, 6.34)  |                     |                     |                      |                     |                                    |
| $\sigma_2$ | 0.64 (-1.13, 2.47) | 4.30 (0.79, 8.90)   |                     |                      |                     |                                    |
| $\sigma_3$ | 0.44 (-0.98, 1.83) | 1.07 (-0.58, 2.82)  | 2.59 (0.57, 4.81)   |                      |                     |                                    |
| $\sigma_4$ | 2.09 (-0.87, 5.65) | 1.11 (-2.66, 5.27)  | 0.54 (-2.38, 3.48)  | 12.05 (-1.48, 36.21) |                     |                                    |
| $\sigma_5$ | 1.49 (-0.88, 4.25) | 0.71 (-2.26, 4.10)  | -0.79 (-3.06, 1.51) | 3.51 (-2.01, 10.00)  | 8.60 (-0.58, 22.03) |                                    |
| $\sigma_6$ | 0.81 (-0.11, 1.79) | 0.61 (-0.42, 1.72)  | 0.51 (-0.31, 1.36)  | 0.28 (-1.67, 2.27)   | -0.18 (-1.75, 1.41) | 1.26 (0.48, 2.15)                  |

## 413 L Results for Egger et al. [6] data

414 There were clear differences in density between areas in the Egger et al. [6] data (Figure X). In particular,  
415 area *A* appeared to have more *Verella* but less *Porpita*, *Janthina* and plastic than area *C*. However, the  
416 median count was zero for every taxon in these data, and it is likely that this contributes to the lack  
417 of information on many quantities of interest, outlined below. Note that the regression lines in Figure  
418 X generally lie below the points corresponding to non-zero counts because the lines are pulled down by  
419 zero counts, not because the model is failing.

420 Tracer effects (Figure Y) appeared weaker than for the Vortex Swim data, and were centred close to  
421 zero for *Verella* (Figure Ya) and *Physalia* (Figure Ye), and for plastic except in area *B* (where they were  
422 centred between 0 and 1, but uncertain: Figure Yf). For other taxa, tracer effects were centred between  
423 0 and 1, and were uncertain, but more likely to be positive than negative.

424 Averaged over tracer concentrations, area *C* had more *Verella*, *Porpita* and plastic than area *B*, and  
425 less *Janthina*, *Glaucus* and *Physalia* (Figure Z). Area *B* had more *Janthina*, *Glaucus*, *Physalia* and  
426 plastic than area *A*, and less *Verella* (Figure AA).

427 Marginal correlations between log neuston densities and log plastic density across  $\Omega_{\text{all}}$  were clearly  
428 negative for *Verella* (Figure ABa) and positive for *Janthina* (Figure ABc). For other taxa and total log  
429 neuston, there was little information in the data on these marginal correlations (Figure ABb, d, e and f:  
430 posterior densities are not clearly different from priors). The within-region marginal correlations  $\Omega_C$ ,  $\Omega_B$   
431 and  $\Omega_A$  were similar for each region (Figures AC, AD and AE). These were weakly positive for *Verella*  
432 (panel a in each figure) and weakly negative for *Janthina* (panel c in each figure). Note that these signs  
433 were opposite to those across the entire region  $\Omega_{\text{all}}$ . For other taxa, there was little information in the  
434 data, and posterior densities were not clearly different to priors.

435 Posterior distributions of all parameters summarized in Table B.



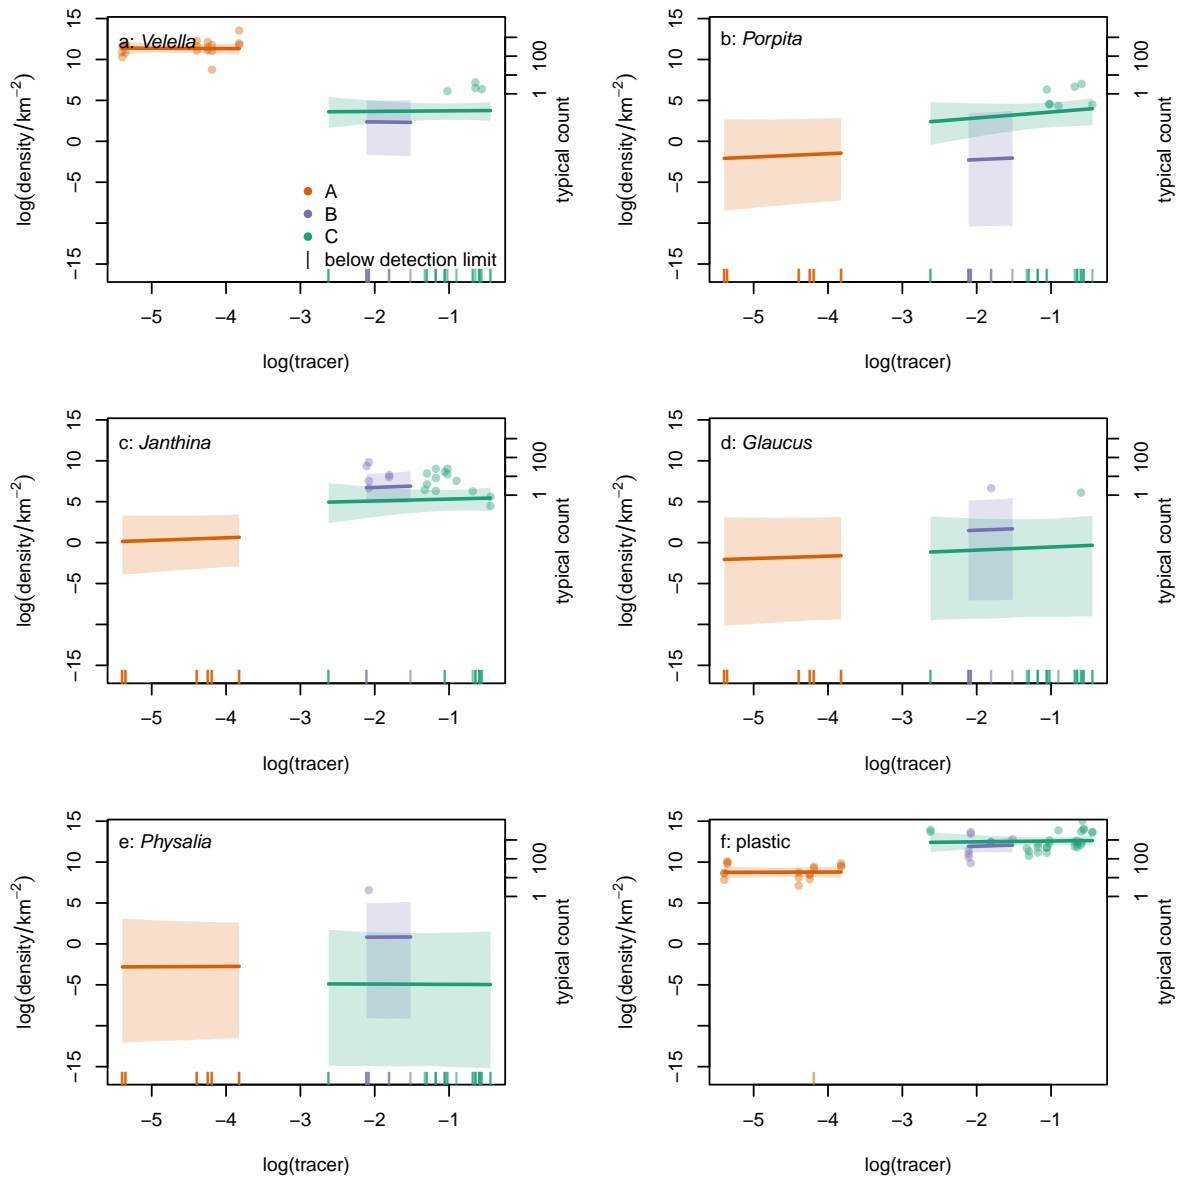

Figure X: Relationship between natural log of density (in numbers  $\text{km}^{-2}$ ) and natural log of dimensionless tracer concentration in the Egger et al. [6] data for (a) *Verella*, (b) *Porpita*, (c) *Janthina*, (d) *Glaucus*, (e) *Physalia* and (f) plastic in areas A (orange), B (purple) and C (green). Points are sample estimates of density, with zeros plotted as vertical lines on the  $x$ -axis (note that models were fitted to the counts, not the densities). Lines are posterior means, with 95% equal-tailed credible bands. The right-hand  $y$ -axis has tick marks at the log densities corresponding to counts of 1, 10, 100 and 1000 objects in the mean trawled area. The data underlying this Figure can be found in S1 Data.

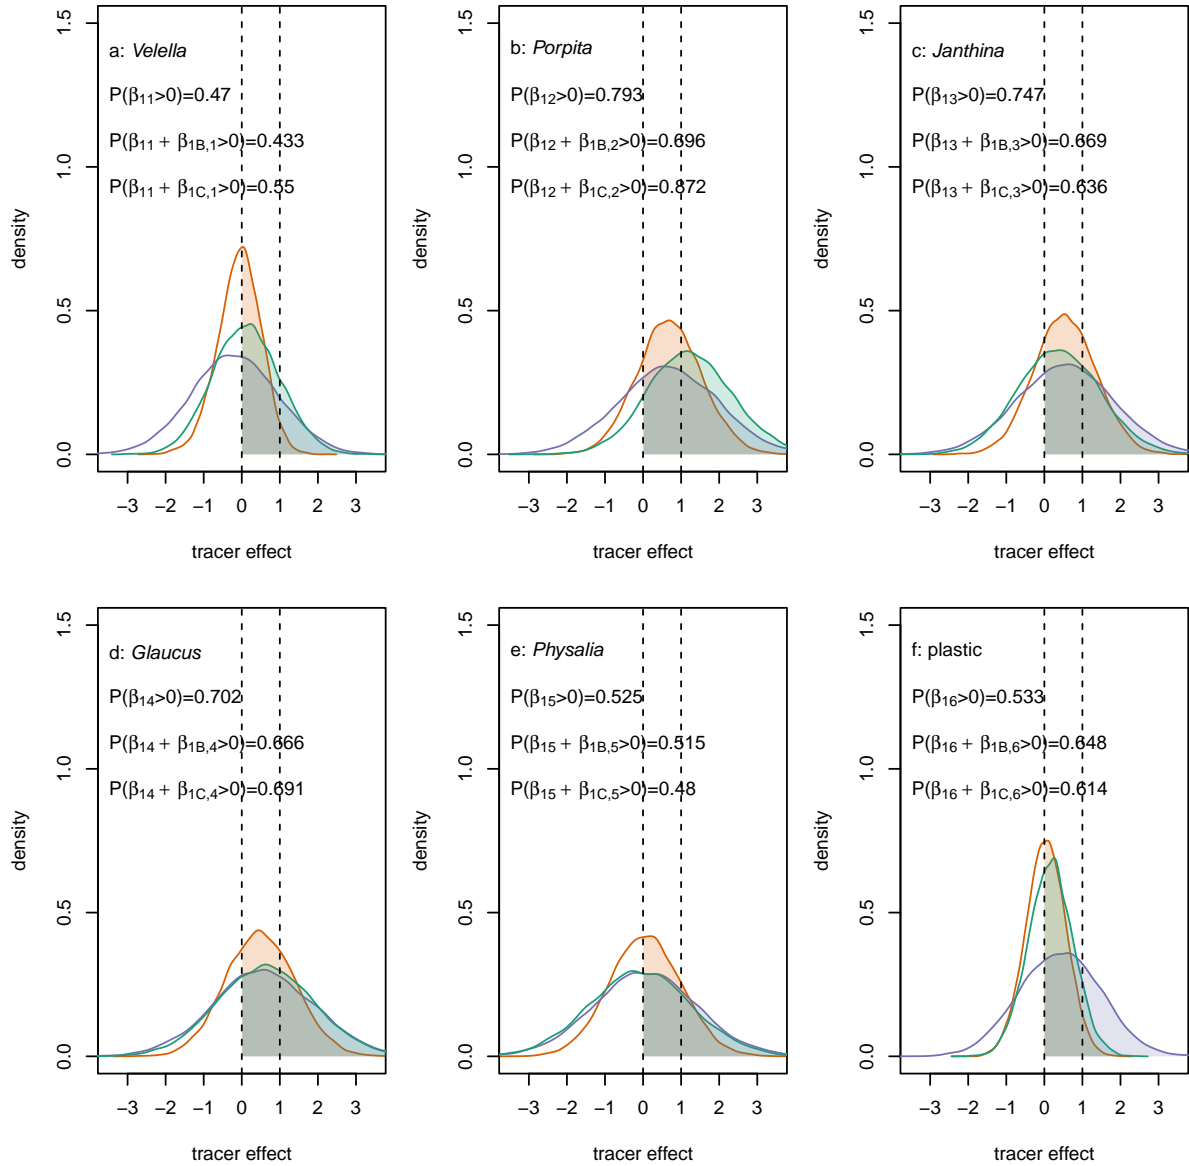

Figure Y: Effect of (centered and scaled) natural log tracer concentration on expected natural log of density (in numbers  $\text{km}^{-2}$ ) for the Egger et al. [6] data for (a) *Veilella*, (b) *Porpita*, (c) *Janthina*, (d) *Glaucus*, (e) *Physalia* and (f) plastic in areas A (orange,  $\beta_{1,i}$ ), B (purple,  $\beta_{1,i} + \beta_{1B,i}$ ) and C (green,  $\beta_{1,i} + \beta_{1C,i}$ ). Kernel density estimates of posterior distributions, with posterior probability that the effect is positive given on each panel. Vertical dashed lines at 0 and 1, physically important values for the effect. The data underlying this Figure can be found in S1 Data.

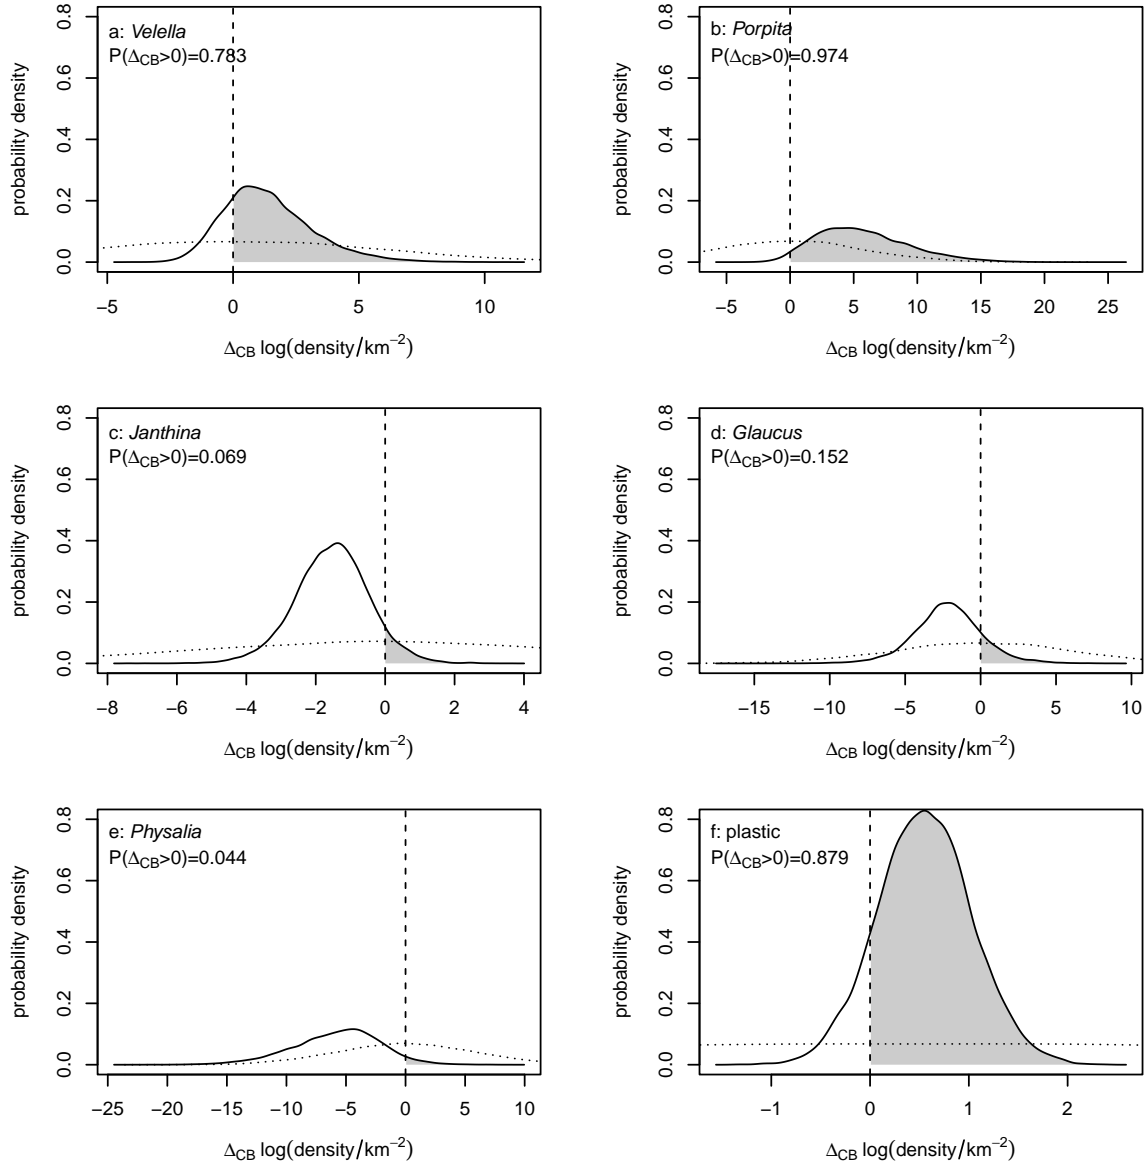

Figure Z: Difference  $\Delta_{CB}$  in expected natural log of density (in numbers  $\text{km}^{-2}$ ) in the Egger et al. [6] data between the C ( $\Omega_C$ ) and B ( $\Omega_B$ ) regions for (a) *Velella*, (b) *Porpita*, (c) *Janthina*, (d) *Glaucus*, (e) *Physalia* and (f) plastic. Kernel density estimates of posterior distributions, with posterior probability that the difference is positive given on each panel. Dotted lines are kernel density estimates of the prior distribution for each difference. The data underlying this Figure can be found in S1 Data.

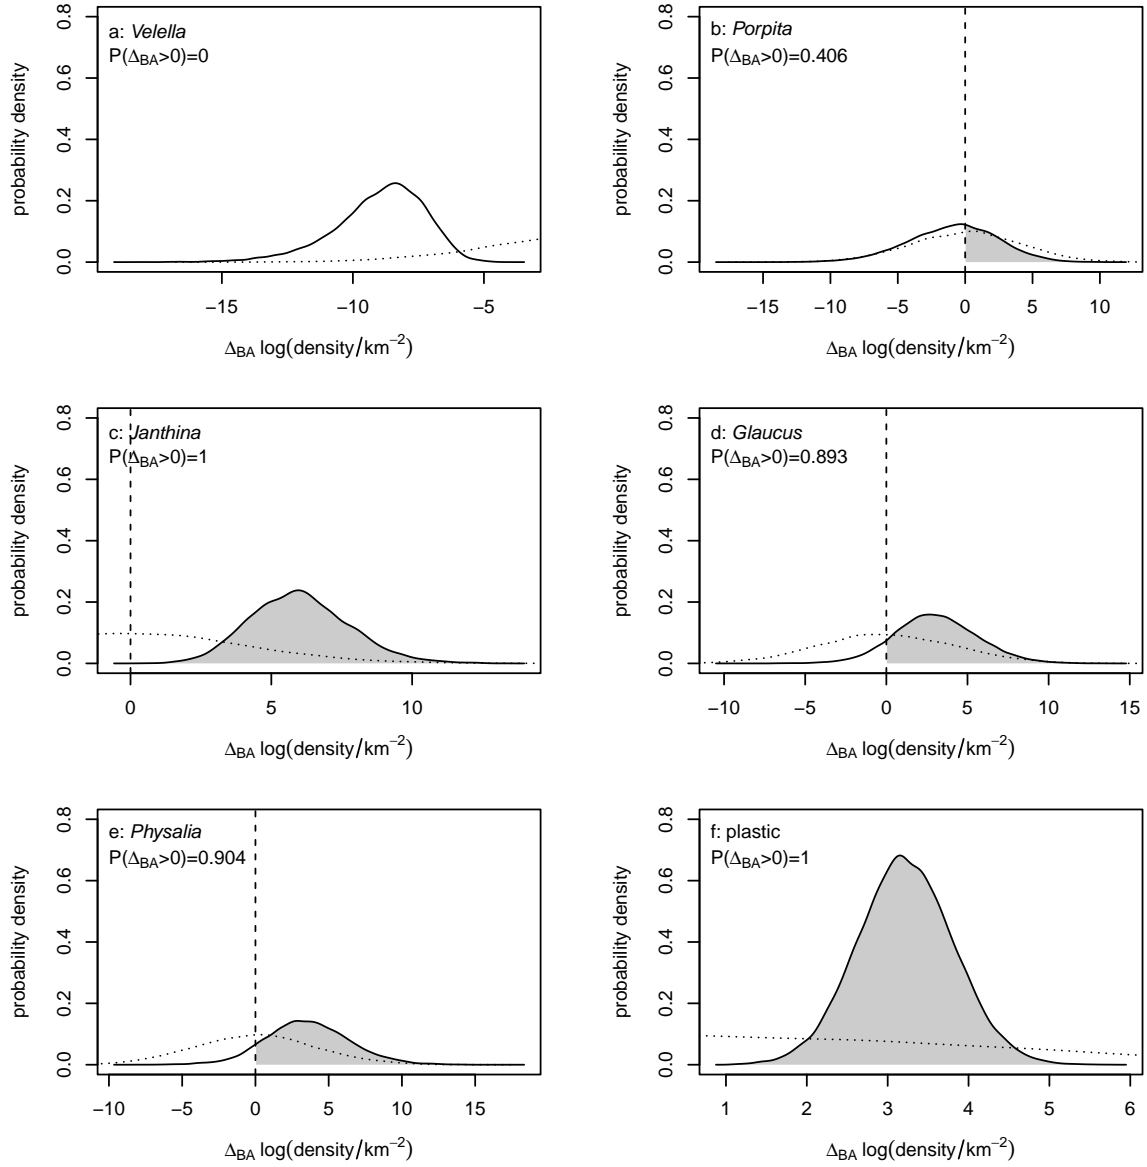

Figure AA: Difference  $\Delta_{BA}$  in expected natural log of density (in numbers  $\text{km}^{-2}$ ) in the Egger et al. [6] data between the  $B$  ( $\Omega_B$ ) and  $A$  ( $\Omega_A$ ) regions for (a) *Velella*, (b) *Porpita*, (c) *Janthina*, (d) *Glaucus*, (e) *Physalia* and (f) plastic. Kernel density estimates of posterior distributions, with posterior probability that the difference is positive given on each panel. Dotted lines are kernel density estimates of the prior distribution for each difference. The data underlying this Figure can be found in S1 Data.

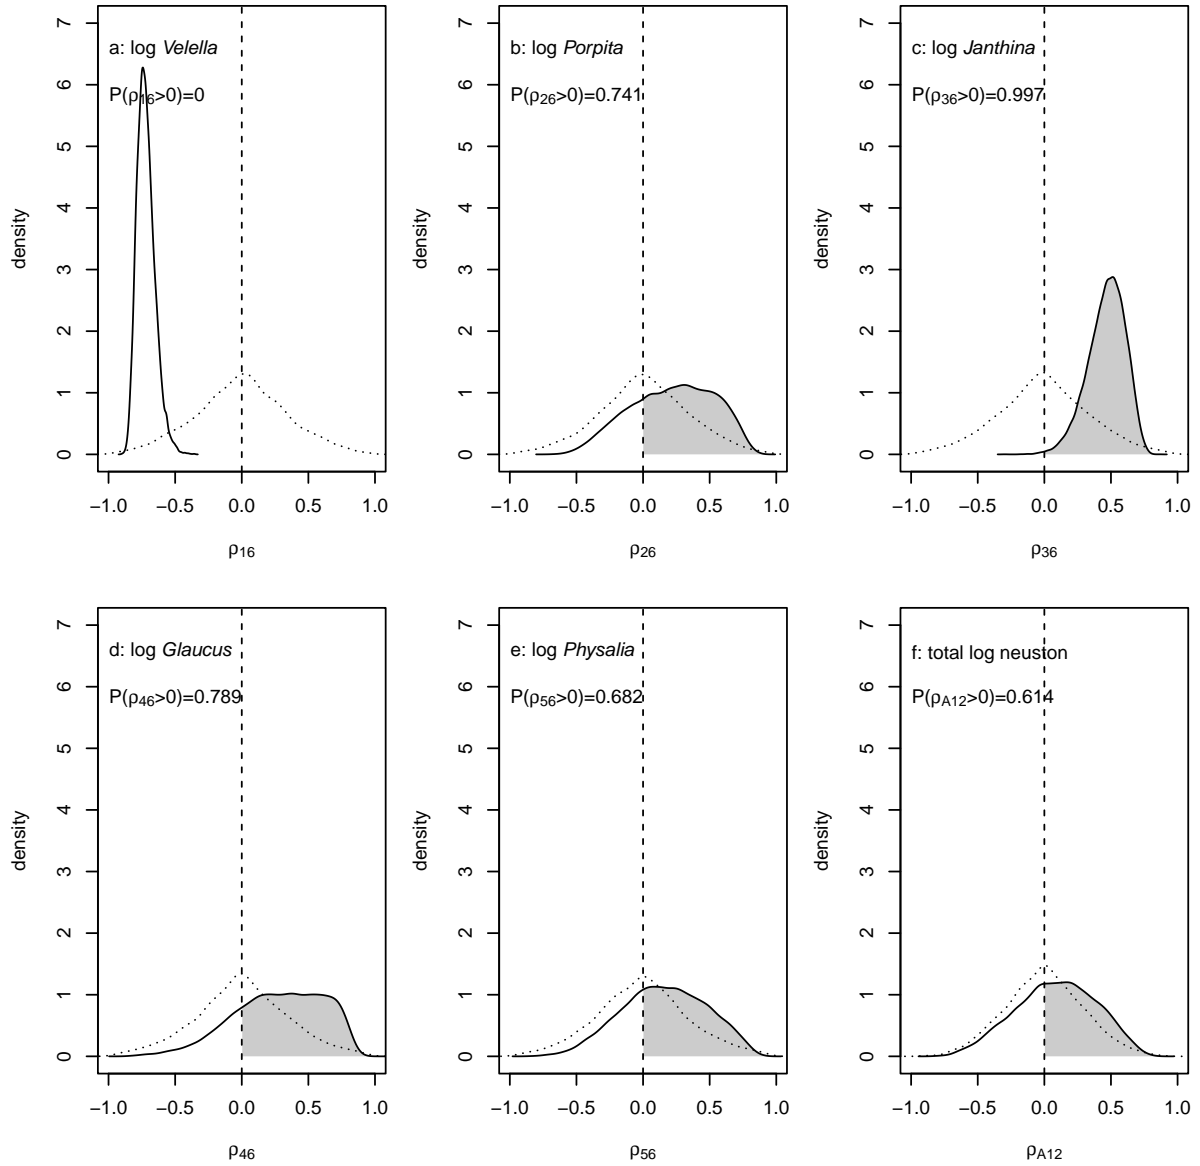

Figure AB: Posterior densities of marginal correlations  $\rho$  in the Egger et al. [6] data over the entire region  $\Omega_{\text{all}}$  between log plastic density and log densities of a: *Velella*, b: *Porpita*, c: *Janthina*, d: *Glaucus*, e: *Physalia* and f: total log neuston. Kernel density estimates, with vertical dashed lines at zero. Posterior probability that each marginal correlation is positive is indicated. Dotted lines are kernel density estimates of the prior distribution for each correlation. Based on 2019 tracer data. The data underlying this Figure can be found in S1 Data.

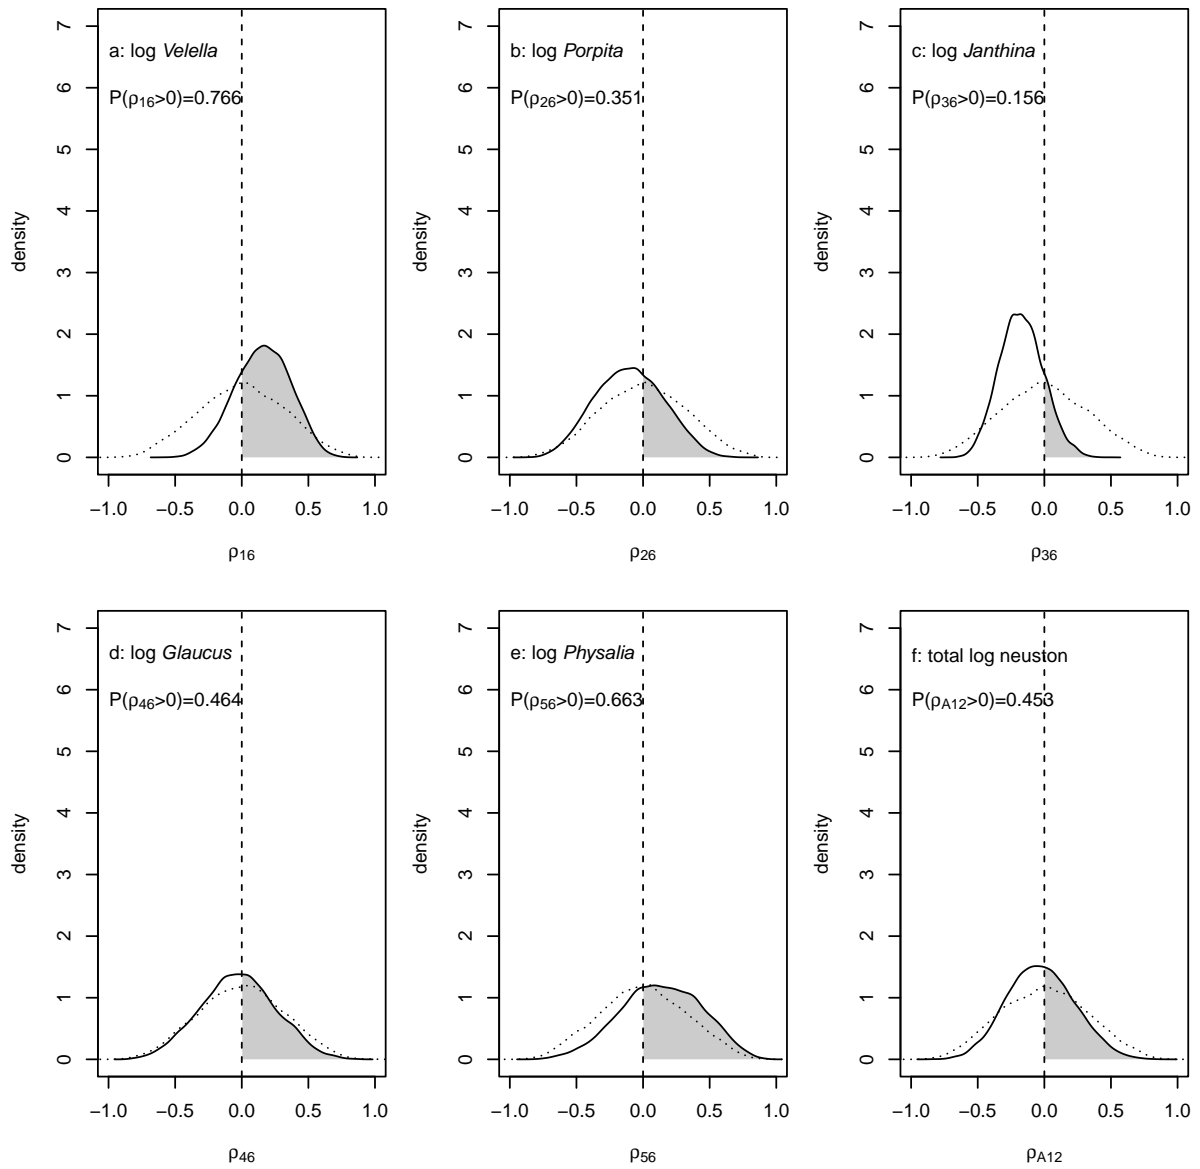

Figure AC: Posterior densities of marginal correlations  $\rho$  in the Egger et al. [6] data over the region  $\Omega_C$  between log plastic density and log densities of a: *Velella*, b: *Porpita*, c: *Janthina*, d: *Glaucus*, e: *Physalia* and f: total log neuston. Kernel density estimates, with vertical dashed lines at zero. Posterior probability that each marginal correlation is positive is indicated. Dotted lines are kernel density estimates of the prior distribution for each correlation. Based on 2019 tracer data. The data underlying this Figure can be found in S1 Data.

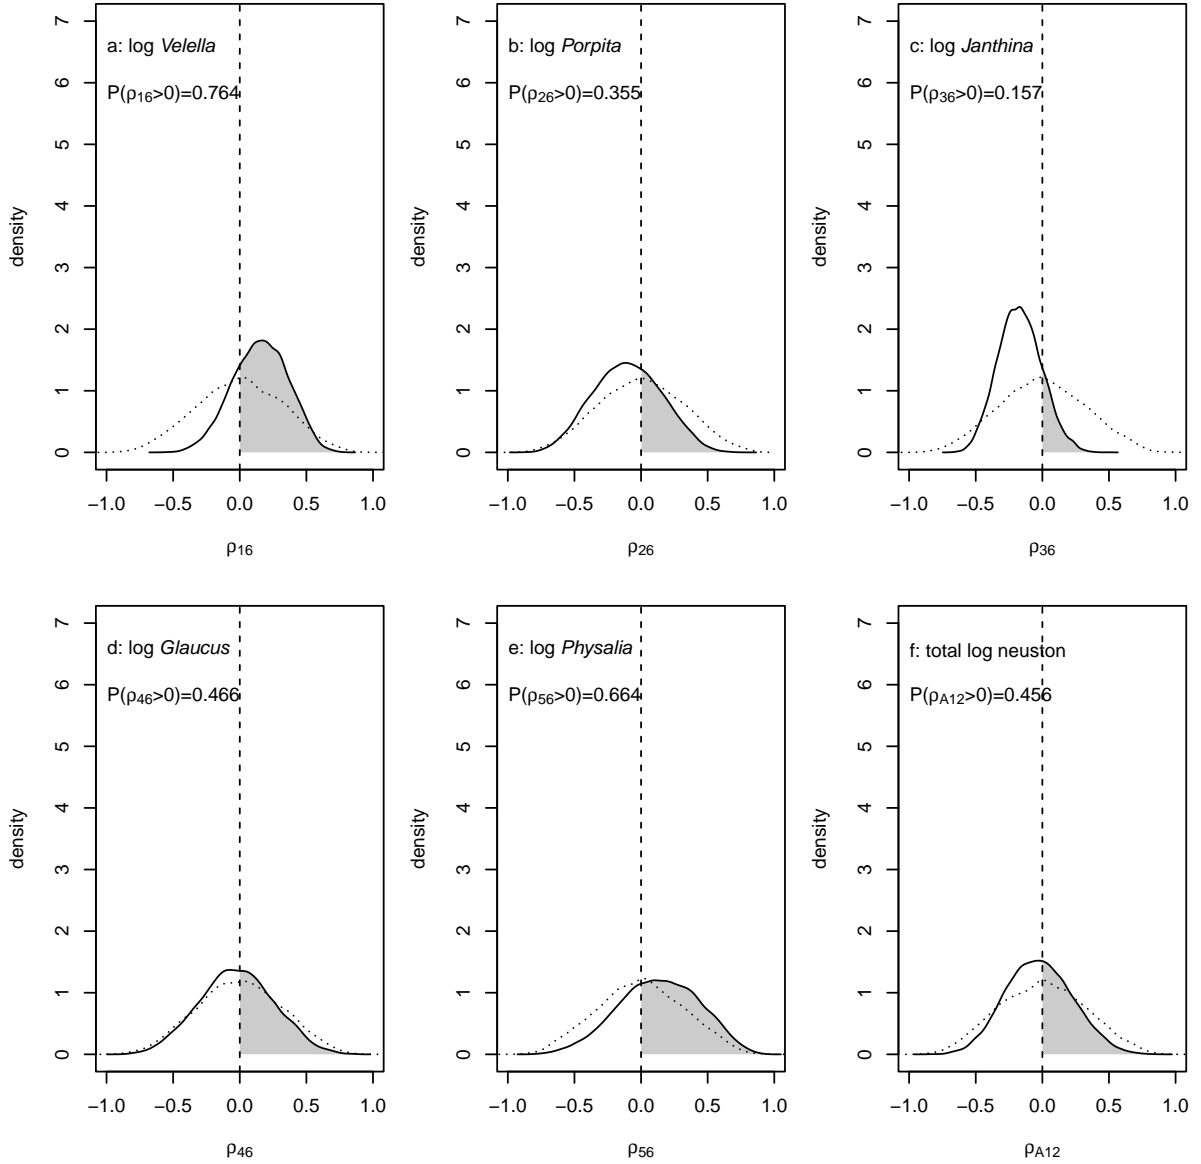

Figure AD: Posterior densities of marginal correlations  $\rho$  in the Egger et al. [6] data over the region  $\Omega_B$  between log plastic density and log densities of a: *Veleva*, b: *Porpita*, c: *Janthina*, d: *Glaucus*, e: *Physalia* and f: total log neuston. Kernel density estimates, with vertical dashed lines at zero. Posterior probability that each marginal correlation is positive is indicated. Dotted lines are kernel density estimates of the prior distribution for each correlation. Based on 2019 tracer data. The data underlying this Figure can be found in S1 Data.

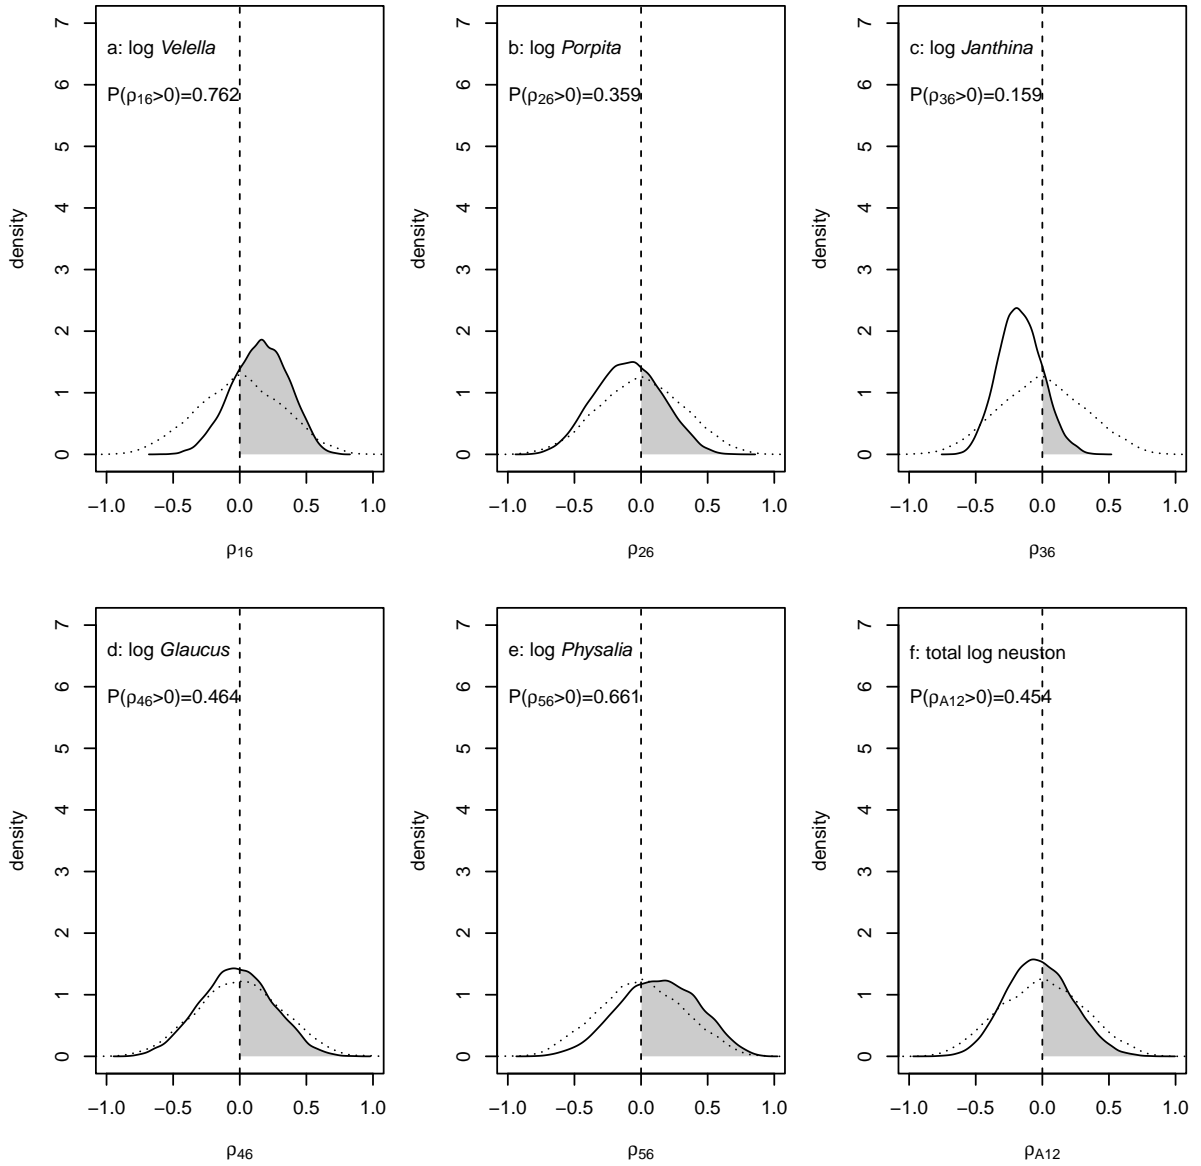

Figure AE: Posterior densities of marginal correlations  $\rho$  in the Egger et al. [6] data over the region  $\Omega_A$  between log plastic density and log densities of a: *Veleva*, b: *Porpita*, c: *Janthina*, d: *Glaucus*, e: *Physalia* and f: total log neuston. Kernel density estimates, with vertical dashed lines at zero. Posterior probability that each marginal correlation is positive is indicated. Dotted lines are kernel density estimates of the prior distribution for each correlation. Based on 2019 tracer data. The data underlying this Figure can be found in S1 Data.



Table B: Parameter estimates for the model defined by Equation H fitted to data from Egger et al. [6]: intercept  $\beta_0$ , tracer effect  $\beta_1$ , patch effects  $\beta_B$  and  $\beta_C$ , interaction effect  $\beta_{1B}$  and  $\beta_{1C}$ , rows of lower triangle of covariance matrix  $\Sigma$  of observation-level random effects. Columns are taxa and plastic. Each cell contains the posterior mean, with marginal 95% credible highest density regions in parentheses. For two elements of row 5 of  $\Sigma$ , the highest density region consists of multiple disjoint intervals.

|              | <i>Velilla</i>        | <i>Porpita</i>      | <i>Janthina</i>     | <i>Glaucus</i>       | <i>Physalia</i>     | plastic            |
|--------------|-----------------------|---------------------|---------------------|----------------------|---------------------|--------------------|
| $\beta_0$    | 11.27 (9.72, 12.83)   | -0.84 (-5.80, 4.05) | 1.12 (-2.21, 4.51)  | -1.18 (-7.31, 4.89)  | -2.69 (-9.74, 4.06) | 8.82 (7.38, 10.28) |
| $\beta_1$    | -0.06 (-1.19, 1.07)   | 0.70 (-1.00, 2.38)  | 0.55 (-1.06, 2.16)  | 0.49 (-1.31, 2.29)   | 0.06 (-1.77, 1.90)  | 0.04 (-1.00, 1.08) |
| $\beta_B$    | -8.87 (-12.42, -5.26) | -1.53 (-7.87, 4.77) | 5.52 (1.82, 9.25)   | 2.58 (-2.52, 7.67)   | 3.51 (-2.14, 9.13)  | 3.04 (1.20, 4.88)  |
| $\beta_C$    | -7.64 (-10.16, -5.12) | 3.45 (-1.71, 8.46)  | 3.89 (-0.13, 7.90)  | 0.13 (-5.01, 5.31)   | -2.21 (-8.63, 4.33) | 3.62 (1.67, 5.56)  |
| $\beta_{1B}$ | -0.13 (-2.09, 1.83)   | -0.02 (-1.99, 1.95) | 0.00 (-1.94, 1.94)  | 0.09 (-1.86, 2.04)   | -0.00 (-1.96, 1.95) | 0.37 (-1.50, 2.25) |
| $\beta_{1C}$ | 0.18 (-1.41, 1.76)    | 0.55 (-1.22, 2.32)  | -0.16 (-1.92, 1.60) | 0.15 (-1.74, 2.03)   | -0.12 (-2.05, 1.80) | 0.13 (-1.19, 1.44) |
| $\sigma_1$   | 1.38 (0.40, 2.51)     |                     |                     |                      |                     |                    |
| $\sigma_2$   | -0.13 (-1.28, 0.99)   | 2.69 (-0.08, 7.03)  |                     |                      |                     |                    |
| $\sigma_3$   | -0.06 (-1.51, 1.40)   | 0.44 (-1.67, 2.64)  | 6.05 (1.91, 11.08)  |                      |                     |                    |
| $\sigma_4$   | -0.06 (-2.59, 2.25)   | -0.18 (-3.56, 2.61) | -0.14 (-4.48, 3.85) | 8.17 (-0.48, 36.35)  |                     |                    |
| $\sigma_5$   | 0.07 (-2.34, 2.38)    | 0.02 (-3.12, 3.38)  | 1.01 (-2.86, 6.22)  | -0.16 (-6.78, -6.77) | 8.28 (-0.60, 33.51) |                    |
|              |                       |                     |                     | (-5.34, 4.86)        | (38.90, 39.13)      |                    |
| $\sigma_6$   | 0.20 (-0.38, 0.79)    | -0.17 (-1.22, 0.86) | -0.49 (-1.53, 0.53) | -0.07 (-1.91, 1.83)  | 0.45 (-1.37, 2.85)  | 1.37 (0.78, 1.95)  |

## References

- [1] J. Aitchison and C. H. Ho. The multivariate Poisson-log normal distribution. *Biometrika*, 76: 643–653, 1989.
- [2] B. Carpenter, A. Gelman, M. D. Hoffman, D. Lee, B. Goodrich, M. Betancourt, M. Brubaker, J. Guo, P. Li, and A. Riddell. Stan: a probabilistic programming language. *Journal of Statistical Software*, 76:1–32, 2017. doi: 10.18637/jss.v076.i01.
- [3] G. Casella and R. L. Berger. *Statistical inference*. Duxbury, Pacific Grove, CA, second edition, 2002.
- [4] E. A. Catchpole and B. J. T. Morgan. Detecting parameter redundancy. *Biometrika*, 84:187–196, 1997.
- [5] Matthias Egger, Rein Nijhof, Lauren Quiros, Giulia Leone, Sarah-Jeanne Royer, Andrew C McWhirter, Gennady A Kantakov, Vladimir I Radchenko, Evgeny A Pakhomov, Brian P V Hunt, and Laurent Lebreton. A spatially variable scarcity of floating microplastics in the eastern North Pacific Ocean. *Environmental Research Letters*, 15:114056, 2020.
- [6] Matthias Egger, Lauren Quiros, Giulia Leone, Francesco Ferrari, Christiana M. Boerger, and Michelle Tishler. Relative abundance of floating plastic debris and neuston in the Eastern North Pacific Ocean. *Frontiers in Marine Science*, 8:626026, 2021.
- [7] M. A. Hamdan and C. P. Tsokos. A model for physical and biological problems: the bivariate-compounded Poisson distribution. *Review of the International Statistical Institute*, 39:60–63, 1971.
- [8] Matthew D. Hoffman and Andrew Gelman. The No-U-Turn Sampler: Adaptively setting path lengths in Hamiltonian Monte Carlo. *Journal of Machine Learning Research*, 15:1351–1381, 2014.
- [9] N. L. Johnson, S. Kotz, and N. Balakrishnan. *Discrete Multivariate Distributions*. John Wiley & Sons, Inc., New York, 1997.
- [10] D. Lewandowski, D. Kurowicka, and H. Joe. Generating random correlation matrices based on vines and extended onion method. *Journal of Multivariate Analysis*, 100:1989–2001, 2009.
- [11] R Core Team. *R: A Language and Environment for Statistical Computing*. R Foundation for Statistical Computing, Vienna, Austria, 2022. URL <https://www.R-project.org/>.
- [12] A. I. Savilov. Pleuston of the Pacific Ocean. In L. A. Zenkevich, editor, *Biology of the Pacific Ocean*, pages 318–426. U.S. Naval Oceanographic Office, Washington, D.C., 1970.
- [13] Stan Development Team. Stan modeling language users guide and reference manual, version 2.30, 2022. URL <https://mc-stan.org/docs/stan-users-guide>.

- 467 [14] Stan Development Team. RStan: the R interface to Stan, 2022. URL <https://mc-stan.org/>. R  
468 package version 2.21.5.
- 469 [15] Sean Talts, Michael Betancourt, Daniel Simpson, Aki Vehtari, and Andrew Gelman. Vali-  
470 dating Bayesian inference algorithms with simulation-based calibration. *arXiv e-prints*, art.  
471 arXiv:1804.06788, 2018. arXiv:1804.06788.
- 472 [16] A. Vehtari, A. Gelman, and J. Gabry. Practical Bayesian model evaluation using leave-one-out  
473 cross-validation and WAIC. *Statistics and Computing*, 27:1413–1432, 2017.
